# Supplementary material for: Intestinal activating transcription factor 4 regulates stress-related behavioral alterations via paraventricular thalamus in male mice
Source: PubMed Central journal article supplement — Proc Natl Acad Sci U S A. 2023 May 1;120(19):e2215590120. doi: 10.1073/pnas.2215590120 (PMC10175747; doi:10.1073/pnas.2215590120), 2023-05-01
Supplement: pnas.2215590120.sapp.pdf [file pnas.2215590120.sapp.pdf]

# **Intestinal activating transcription factor 4 regulates stress-related behavioral alterations via paraventricular thalamus in male mice**

## **Authors**

Feixiang Yuan<sup>a,1</sup>, Ziheng Zhou<sup>b,1</sup>, Shangming Wu<sup>b</sup>, Fuxin Jiao<sup>b</sup>, Liang Chen<sup>c</sup>, Leilei Fang<sup>c</sup>, Hanrui Yin<sup>b</sup>, Xiaoming Hu<sup>a</sup>, Xiaoxue Jiang<sup>a</sup>, Kan Liu<sup>b</sup>, Fei Xiao<sup>a</sup>, Haizhou Jiang<sup>b</sup>, Shanghai Chen<sup>a</sup>, Zhanju Liu<sup>c</sup>, Yousheng Shu<sup>a</sup> and Feifan Guo<sup>a,2</sup>

## **Affiliations**

<sup>a</sup>Zhongshan Hospital, State Key Laboratory of Medical Neurobiology, Institute for Translational Brain Research, MOE Frontiers Center for Brain Science, Fudan University, Shanghai, 200032, China

<sup>b</sup>Chinese Academy of Sciences (CAS) Key Laboratory of Nutrition, Metabolism and Food Safety, Innovation Center for Intervention of Chronic Disease and Promotion of Health, Shanghai Institute of Nutrition and Health, University of Chinese Academy of Sciences, Chinese Academy of Sciences, Shanghai, 200031, China

<sup>c</sup>Center for Inflammatory Bowel Disease Research, The Shanghai Tenth People's Hospital, Tongji University School of Medicine, Shanghai, 200072, China

<sup>1</sup>Feixiang Yuan and Ziheng Zhou contributed equally to this study.

<sup>2</sup>To whom correspondence may be addressed. Correspondence to: Feifan Guo

Address: 131 Dongan Road, Shanghai, China 200032

Email: ffguo@fudan.edu.cn; Tel: 86-21-5423-7056; Fax: 0086 21 5423 7056

## **Running title:**

Enteric ATF4 regulates stress-related behaviors

## Supplementary figures, figure legends and tables

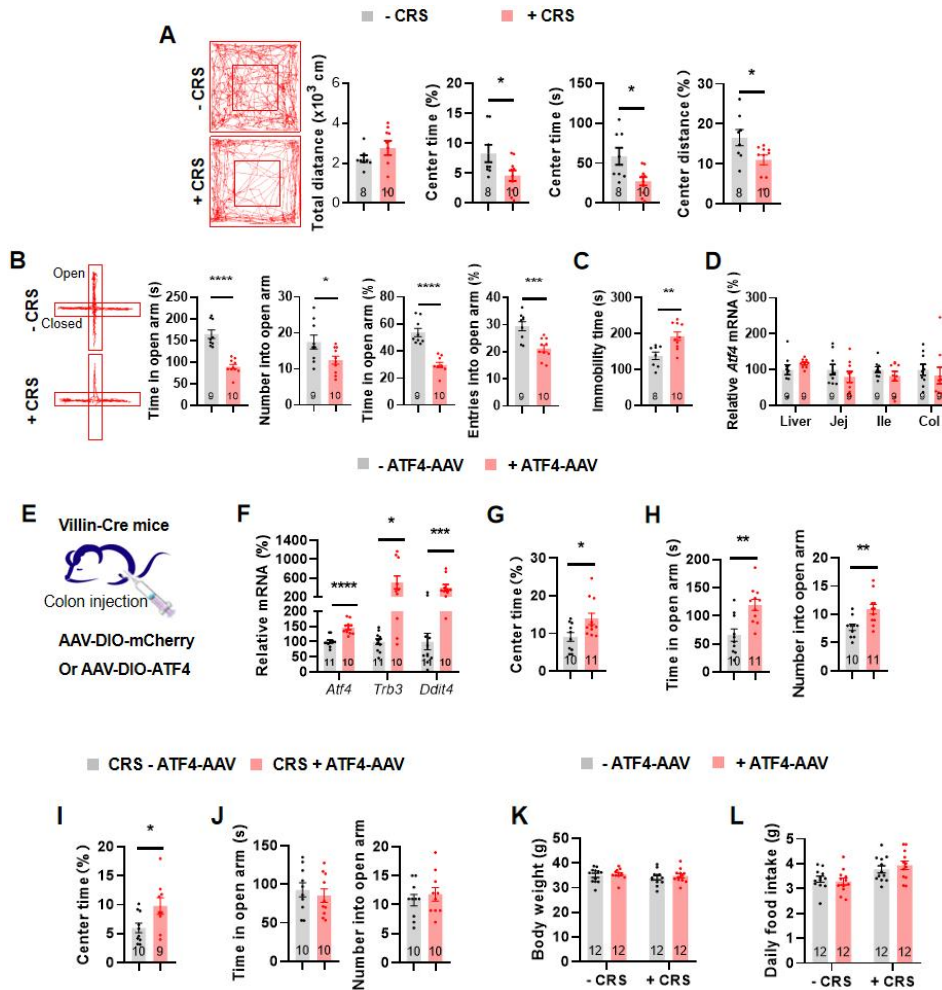

**Fig. S1. Behavioral effects of mice subjected to chronic restraint stress (CRS) or AAVs.**

A. Representative tracks of mice in open field test (OFT), travel distance (Unpaired t test with Welch's correction,  $t_{12.67} = 1.368$ ,  $P = 0.1952$ ), percentage of time spent in center ( $t_{16} = 2.287$ ,  $P = 0.0361$ ), time spent in center ( $t_{16} = 2.806$ ,  $P = 0.0127$ ), and percentage of distance in center area ( $t_{16} = 2.438$ ,  $P = 0.0268$ ).

B. Representative tracks of mice in elevated plus maze test (EPM), the time spent in the open arms ( $t_{17} = 6.769$ ,  $P < 0.0001$ ), the number of entries into the open arms ( $t_{17} = 2.320$ ,  $P = 0.0330$ ), percentage of time spent in the open arms ( $t_{17} = 6.960$ ,  $P < 0.0001$ ), and percentage of entries into the open arms ( $t_{17} = 4.078$ ,  $P = 0.0008$ ).

C. Immobility time of tail suspension test (TST) ( $t_{16} = 3.405$ ,  $P = 0.0036$ ).

D. Gene expression of *Atf4* in liver (Unpaired *t* test with Welch's correction,  $t_{9,422} = 1.178$ ,  $P = 0.2677$ ), jejunal (Jej) ( $t_{16} = 0.9478$ ,  $P = 0.3573$ ), ileal (Ile) ( $t_{16} = 1.157$ ,  $P = 0.2641$ ) and colonic (Col) (Mann Whitney test,  $P = 0.2224$ ) lamina propria by RT-PCR.

E. Schematic of Colonic injection of AAV in Villin-Cre mice.

F. Gene expression of *Atf4* ( $t_{19} = 5.319$ ,  $P < 0.0001$ ), *Trb3* (Unpaired *t* test with Welch's correction,  $t_{9,086} = 3.043$ ,  $P = 0.0138$ ) and *Ddit* (Mann Whitney test,  $P = 0.0001$ ) in colon epithelial cells by RT-PCR.

G. Percentage of time spent in center in OFT ( $t_{19} = 2.426$ ,  $P = 0.0254$ ).

H. The time spent in the open arms ( $t_{19} = 3.636$ ,  $P = 0.0018$ ), the number of entries into the open arms ( $t_{19} = 3.095$ ,  $P = 0.0060$ ) in EPM.

I. Percentage of time spent in center in OFT ( $t_{17} = 2.363$ ,  $P = 0.0303$ ).

J. The time spent in the open arms ( $t_{18} = 0.5953$ ,  $P = 0.5591$ ), the number of entries into the open arms ( $t_{18} = 0.6591$ ,  $P = 0.5182$ ) in EPM.

K. Body weight (Adenovirus Factor:  $F_{1,44} = 0.6048$ ,  $P = 0.4409$ ; CRS factor:  $F_{1,44} = 1.052$ ,  $P = 0.3107$ ; Adenovirus  $\times$  CRS:  $F_{1,44} = 0.02925$ ,  $P = 0.8650$ ).

L. Average of daily food intake (Adenovirus Factor:  $F_{1,44} = 0.06367$ ,  $P = 0.8020$ ; CRS factor:  $F_{1,44} = 13.44$ ,  $P = 0.0007$ ; Adenovirus  $\times$  CRS:  $F_{1,44} = 0.7795$ ,  $P = 0.3821$ ).

Studies for A-D were conducted using 8–9-week-old male wild-type mice with or without CRS; studies for F-L were conducted using 8–9-week-old male Villin-Cre mice receiving colonic injection of AAVs expressing mCherry (- AAV-ATF4) or ATF4 (+ AAV-ATF4) under normal states (- CRS) or CRS (+ CRS). Data are expressed as the mean  $\pm$  SEM (the number of samples are indicated in the bar graph), with individual data points. Data were analyzed via two-tailed unpaired Student's *t* test or specific test marked in the data.  $*P < 0.05$ ,  $**P < 0.01$ ,  $***P < 0.001$ ,  $****P < 0.0001$ .

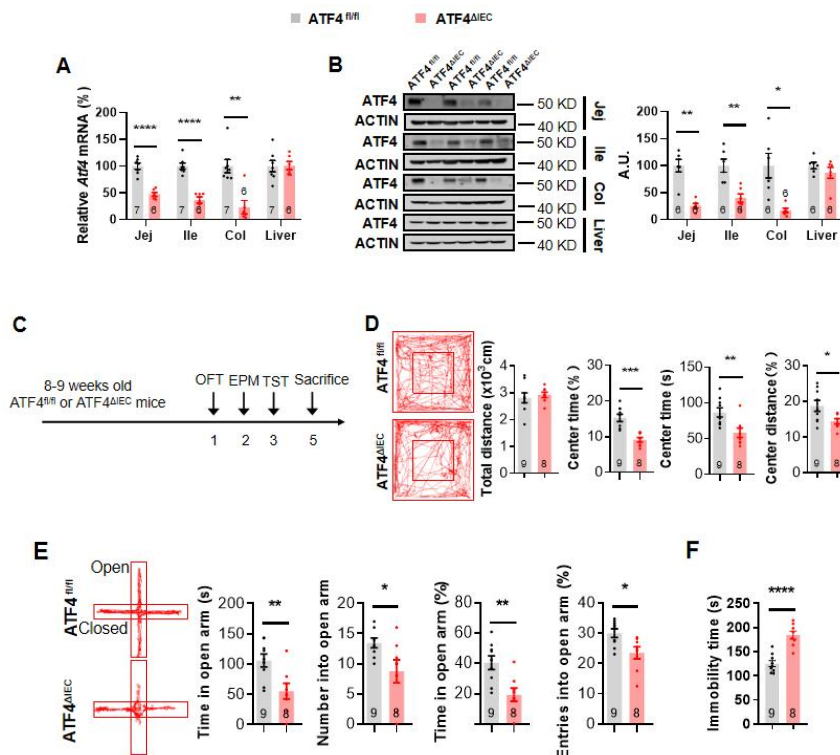

**Fig. S2 Embryonic intestinal ATF4 deletion exhibits stress-related behaviors.**

A. Gene expression of *Atf4* in jejunal (Jej) ( $t_{11} = 7.463$ ,  $P < 0.0001$ ), ileal (Ile) ( $t_{11} = 7.625$ ,  $P < 0.0001$ ) and colonic (Col) (Mann Whitney test,  $P = 0.0082$ ) epithelial cells and liver ( $t_{11} = 0.08589$ ,  $P = 0.9331$ ) by RT-PCR.

B. ATF4 protein in jejunal ( $t_{6.270} = 5.960$ ,  $P = 0.0009$ ), ileal ( $t_{10} = 4.152$ ,  $P = 0.0020$ ) and colonic ( $t_{5.322} = 3.605$ ,  $P = 0.0139$ ) epithelial cells and liver ( $t_{10} = 1.132$ ,  $P = 0.2840$ ) by western blotting (left) and quantified by densitometric analysis (right), A.U.: arbitrary units.

C. Timeline of the behavioral tests. OFT, open field test; EPM, elevated plus maze test; TST, tail suspension test.

D. Representative tracks of mice in OFT, travel distance ( $t_{15} = 0.4957$ ,  $P = 0.6273$ ), percentage of time spent in center ( $t_{15} = 4.857$ ,  $P = 0.0002$ ), time spent in center ( $t_{15} = 3.077$ ,  $P = 0.0077$ ), and percentage of distance in center area ( $t_{15} = 2.440$ ,  $P = 0.0276$ ).

E. Representative tracks of mice in EPM, the time spent in the open arms ( $t_{15} = 3.038$ ,  $P = 0.0083$ ), the number of entries into the open arms (Unpaired t test with Welch's correction,  $t_{9.559} = 2.272$ ,  $P = 0.0475$ ), percentage of time spent in the open arms ( $t_{15} = 3.335$ ,  $P = 0.0045$ ), and percentage of entries into the open arms ( $t_{15} = 2.699$ ,  $P = 0.0165$ ).

F. Immobility time of tail suspension test (TST) ( $t_{15} = 5.780$ ,  $P < 0.0001$ ).

Studies were conducted using 8–9-week-old male  $ATF4^{fl/fl}$  or  $ATF4^{\Delta IEC}$  mice. Data are expressed as the mean  $\pm$  SEM (the number of samples are indicated in the bar graph), with individual data points. Data were analyzed via two-tailed unpaired Student's t test or specific test marked in the data. \* $P < 0.05$ , \*\* $P < 0.01$ , \*\*\* $P < 0.001$ , \*\*\*\* $P < 0.0001$ .

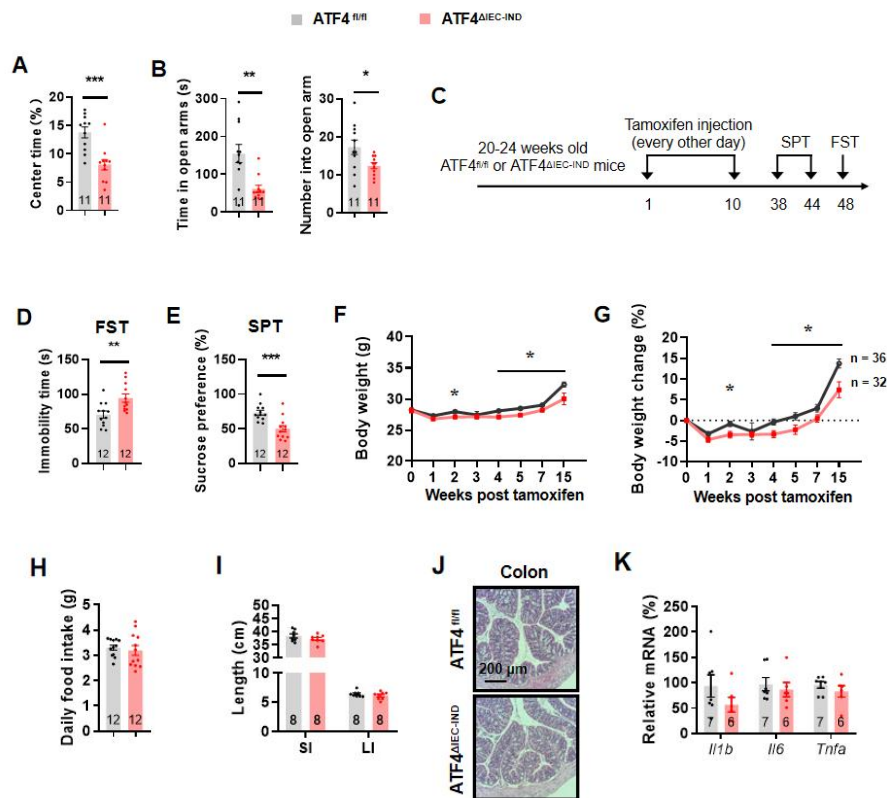

**Fig. S3 Effects of inducible intestinal ATF4 knockout mice.**

A. Percentage of time spent in center in open field test (OFT) ( $t_{20} = 4.269$ ,  $P = 0.0004$ ).

B. The time spent in the open arms (Mann Whitney test,  $P = 0.0032$ ), the number of entries into the open arms (Unpaired t test with Welch's correction,  $t_{13.30} = 2.368$ ,  $P = 0.0337$ ) in elevated plus maze test (EPM).

C. Timeline of the tamoxifen injection and behavioral tests of D and E. FST, forced swim test; SPT, sucrose preference test.

- D. Immobility time of forced swim test (FST) ( $t_{22} = 3.121, P = 0.0050$ ).
- E. Sucrose preference in sucrose preference test (SPT) ( $t_{22} = 4.026, P = 0.0006$ ).
- F. Body weight curve after tamoxifen administration.
- G. Relative body weight change curve after tamoxifen administration.
- H. Average of daily food intake (Unpaired *t test* with Welch's correction,  $t_{16.27} = 0.5048, P = 0.6204$ ).
- I. Length of small intestine (SI) ( $t_{14} = 1.177, P = 0.2590$ ) and large intestine (LI) ( $t_{14} = 1.005, P = 0.3317$ ).
- J. Hematoxylin and eosin (H&E) of colon.
- K. Gene expression of *Il1b* ( $t_{11} = 1.344, P = 0.2059$ ), *Il6* (Mann Whitney test,  $P = 0.6282$ ) and *Tnfa* (Mann Whitney test,  $P = 0.4452$ ) in colonic epithelial cells by RT-PCR.

Studies were conducted using 14–16-week-old male ATF4<sup>fl/fl</sup> or ATF4<sup>ΔIEC-IND</sup> mice. Data are expressed as the mean ± SEM (the number of samples are indicated in the bar graph), with individual data points. Data were analyzed via two-tailed unpaired Student's *t test* or specific test marked in the data. \* $P < 0.05$ , \*\* $P < 0.01$ , \*\*\* $P < 0.001$ .

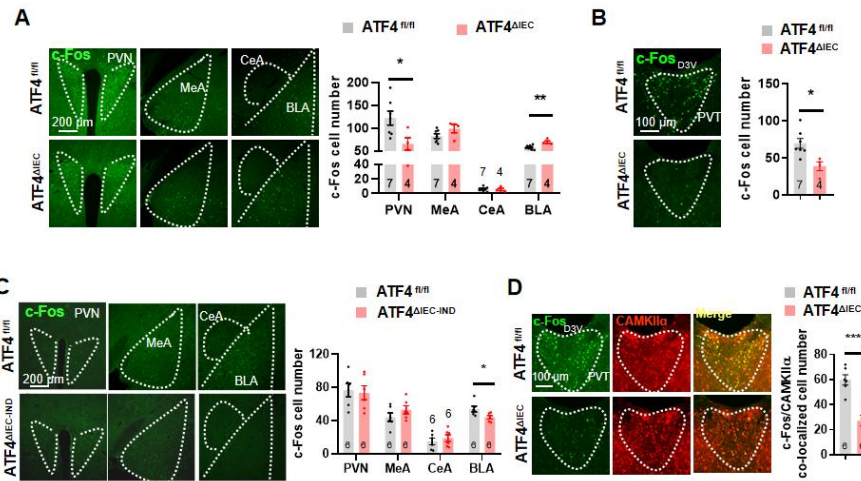

**Fig. S4 Immunofluorescence (IF) staining in the brain of intestinal ATF4 knockout mice.**

A. IF staining for c-Fos (green) in the paraventricular nucleus of hypothalamus (PVN) ( $t_9 = 2.479$ ,  $P = 0.0351$ ), the medial amygdala (MeA) (Mann Whitney test,  $P = 0.0788$ ), the central amygdala (CeA) ( $t_9 = 0.3443$ ,  $P = 0.7385$ ) and the basolateral amygdala (BLA) ( $t_9 = 3.686$ ,  $P = 0.0050$ ), and quantification of c-Fos cell numbers (right).

B. IF staining for c-Fos (green) in the paraventricular thalamus (PVT) (left) and quantification of c-Fos cell numbers (right) ( $t_9 = 3.092$ ,  $P = 0.0129$ ); D3V, dorsal 3rd ventricle.

C. IF staining for c-Fos (green) in the paraventricular nucleus of hypothalamus (PVN) ( $t_{10} = 0.2690$ ,  $P = 0.7934$ ), the medial amygdala (MeA) ( $t_{10} = 1.252$ ,  $P = 0.2392$ ), the central amygdala (CeA) ( $t_{10} = 0.6847$ ,  $P = 0.5091$ ) and the basolateral amygdala (BLA) ( $t_{10} = 2.416$ ,  $P = 0.0363$ ), and quantification of c-Fos cell numbers (right).

D. IF staining for c-Fos (green), CAMKII $\alpha$  (red) or merge (yellow) in PVT (left), and quantification of c-Fos and CAMKII $\alpha$  colocalized cell numbers (right) ( $t_{10} = 5.472$ ,  $P = 0.0003$ ).

Studies for A, B, D were conducted using 8–9-week-old male ATF4<sup>fl/fl</sup> or ATF4<sup>ΔIEC</sup> mice; studies for C were conducted using 14–16-week-old male ATF4<sup>fl/fl</sup> or

ATF4<sup>ΔIEC-IND</sup> mice. Data are expressed as the mean ± SEM (the number of samples are indicated in the bar graph), with individual data points. Data were analyzed via two-tailed unpaired Student's t test or specific test marked in the data. \* $P < 0.05$ , \*\* $P < 0.01$ , \*\*\* $P < 0.001$ .

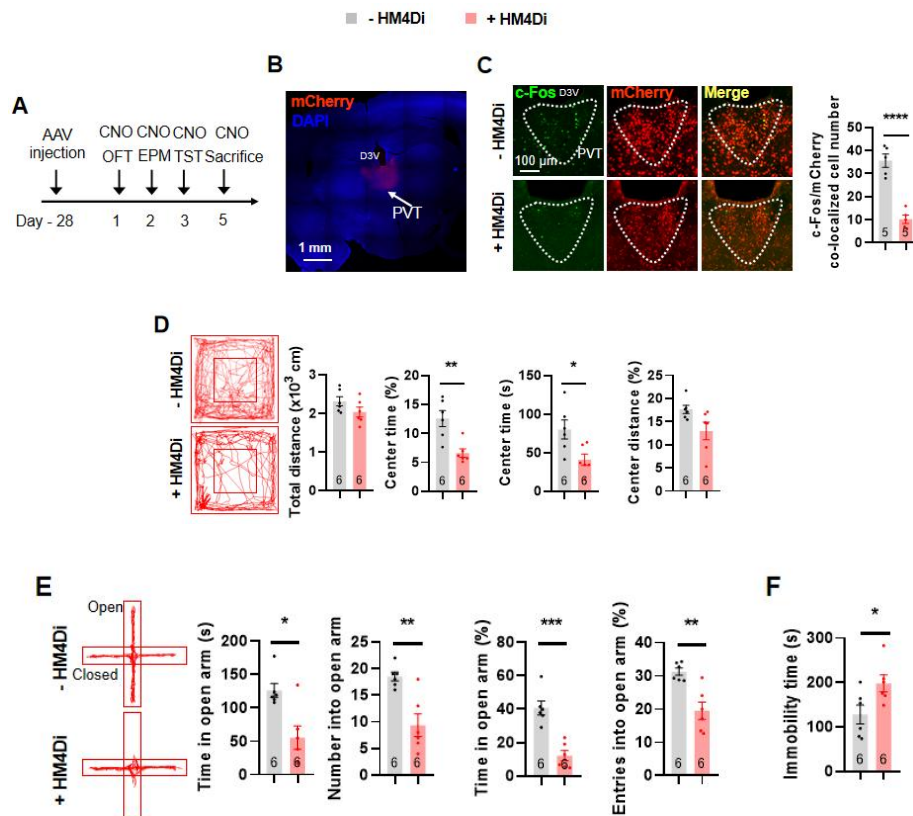

**Fig. S5 Inhibition of paraventricular thalamus (PVT) glutamatergic neurons exhibits stress-related behavioral alterations.**

A. Timeline of experiment procedure and behavioral tests. OFT, open field test; EPM, elevated plus maze test; TST, tail suspension test.

B. Post hoc visualization of mCherry (red) and DAPI (blue) in PVT of wild-type (WT) mice receiving AAV-CAMKII $\alpha$ -HM4Di-mCherry stereotaxic injections; D3V, dorsal 3rd ventricle.

C. Immunofluorescence (IF) staining for c-Fos (green), mCherry (red) or merge (yellow) in PVT (left), and quantification of c-Fos and mCherry colocalized cell numbers (right) ( $t_8 = 7.556$ ,  $P < 0.0001$ ).

D. Representative tracks of mice in OFT, travel distance ( $t_{10} = 1.581$ ,  $P = 0.1450$ ),



percentage of time spent in center ( $t_{10} = 3.807$ ,  $P = 0.0034$ ), time spent in center ( $t_{10} = 2.719$ ,  $P = 0.0216$ ), and percentage of distance in center area ( $t_{10} = 2.214$ ,  $P = 0.0512$ ).

E. Representative tracks of mice in EPM, the time spent in the open arms (Mann Whitney test,  $P = 0.0411$ ), the number of entries into the open arms ( $t_{10} = 4.009$ ,  $P = 0.0025$ ), percentage of time spent in the open arms ( $t_{10} = 5.536$ ,  $P = 0.0002$ ), and percentage of entries into the open arms ( $t_{10} = 4.129$ ,  $P = 0.0020$ ).

F. Immobility time of tail suspension test (TST) ( $t_{10} = 2.449$ ,  $P = 0.0343$ ).

Studies were conducted using 7–8-week-old male WT mice receiving AAVs expressing mCherry (- HM4Di) or HM4Di (+ HM4Di), followed by CNO injection. Data are expressed as the mean  $\pm$  SEM (the number of samples are indicated in the bar graph), with individual data points. Data were analyzed via two-tailed unpaired Student's t test or specific test marked in the data. \* $P < 0.05$ , \*\* $P < 0.01$ , \*\*\* $P < 0.001$ , \*\*\*\* $P < 0.0001$ .

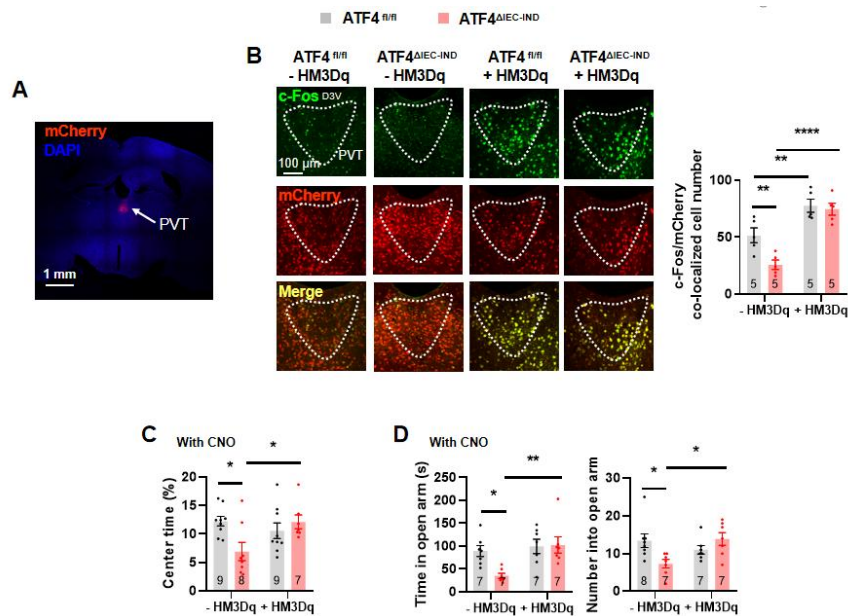

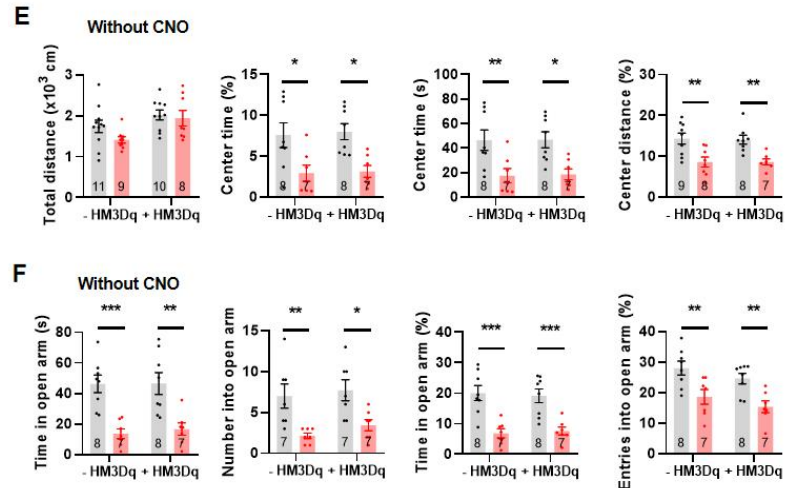

**Fig. S6 Behavioral effects of inducible intestinal ATF4 deletion mice with paraventricular thalamus (PVT) glutamatergic neurons activation.**

A. Post hoc visualization of mCherry (red) and DAPI (blue) in PVT of ATF4<sup>ΔIEC-IND</sup> mice receiving AAV-CAMKII $\alpha$ -HM3Dq-mCherry stereotaxic injections; D3V, dorsal 3rd ventricle.

B. Immunofluorescence (IF) staining for c-Fos (green), mCherry (red) or merge (yellow) in PVT (left), and quantification of c-Fos and mCherry colocalized cell numbers (right) (Genotype Factor:  $F_{1,16} = 6.957$ ,  $P = 0.0179$ ; HM3Dq factor:  $F_{1,16} = 46.93$ ,  $P < 0.0001$ ; Genotype  $\times$  HM3Dq:  $F_{1,16} = 4.360$ ,  $P = 0.0531$ ).

C. Percentage of time spent in center in open field test (OFT) (Genotype Factor:  $F_{1,29} = 2.145$ ,  $P = 0.1538$ ; HM3Dq factor:  $F_{1,29} = 1.841$ ,  $P = 0.1853$ ; Genotype  $\times$  HM3Dq:  $F_{1,29} = 7.147$ ,  $P = 0.0122$ ).

D. The time spent in the open arms (Genotype Factor:  $F_{1,24} = 3.561$ ,  $P = 0.0713$ ; HM3Dq factor:  $F_{1,24} = 8.223$ ,  $P = 0.0085$ ; Genotype  $\times$  HM3Dq:  $F_{1,24} = 4.445$ ,  $P = 0.0456$ ), the number of entries into the open arms (Genotype Factor:  $F_{1,25} = 1.162$ ,  $P = 0.2914$ ; HM3Dq factor:  $F_{1,25} = 1.958$ ,  $P = 0.1740$ ; Genotype  $\times$  HM3Dq:  $F_{1,25} = 8.900$ ,  $P = 0.0063$ ) in elevated plus maze test (EPM).

E. Representative tracks of mice in OFT, travel distance (Genotype Factor:  $F_{1,34} = 2.112$ ,  $P = 0.1553$ ; HM3Dq factor:  $F_{1,34} = 8.248$ ,  $P = 0.0070$ ; Genotype  $\times$  HM3Dq:  $F_{1,34} = 0.8104$ ,  $P = 0.3743$ ), percentage of time spent in center (Genotype Factor:  $F_{1,26} = 17.81$ ,  $P = 0.0003$ ; HM3Dq factor:  $F_{1,26} = 0.07846$ ,  $P = 0.7816$ ; Genotype  $\times$

HM3Dq:  $F_{1,26} = 0.009319$ ,  $P = 0.9238$ ), time spent in center (Genotype Factor:  $F_{1,26} = 18.54$ ,  $P = 0.0002$ ; HM3Dq factor:  $F_{1,26} = 0.01205$ ,  $P = 0.9134$ ; Genotype  $\times$  HM3Dq:  $F_{1,26} = 0.003922$ ,  $P = 0.9505$ ), and percentage of distance in center area (Genotype Factor:  $F_{1,28} = 22.61$ ,  $P < 0.0001$ ; HM3Dq factor:  $F_{1,28} = 0.01271$ ,  $P = 0.9110$ ; Genotype  $\times$  HM3Dq:  $F_{1,26} = 0.01376$ ,  $P = 0.9075$ ).

F. Representative tracks of mice in EPM, the time spent in the open arms (Genotype Factor:  $F_{1,26} = 32.63$ ,  $P < 0.0001$ ; HM3Dq factor:  $F_{1,26} = 0.08644$ ,  $P = 0.7711$ ; Genotype  $\times$  HM3Dq:  $F_{1,26} = 0.06746$ ,  $P = 0.7971$ ), the number of entries into the open arms (Genotype Factor:  $F_{1,24} = 18.88$ ,  $P = 0.0002$ ; HM3Dq factor:  $F_{1,24} = 0.9032$ ,  $P = 0.3514$ ; Genotype  $\times$  HM3Dq:  $F_{1,24} = 0.07373$ ,  $P = 0.7883$ ), percentage of time spent in the open arms (Genotype Factor:  $F_{1,26} = 37.18$ ,  $P < 0.0001$ ; HM3Dq factor:  $F_{1,26} = 0.002266$ ,  $P = 0.9624$ ; Genotype  $\times$  HM3Dq:  $F_{1,26} = 0.1678$ ,  $P = 0.6854$ ), and percentage of entries into the open arms (Genotype Factor:  $F_{1,26} = 37.18$ ,  $P = 0.0001$ ; HM3Dq factor:  $F_{1,26} = 2.548$ ,  $P = 0.1225$ ; Genotype  $\times$  HM3Dq:  $F_{1,26} = 0.002497$ ,  $P = 0.9605$ ).

Studies were conducted using 10–12-week-old male ATF4<sup>fl/fl</sup> or ATF4 <sup>$\Delta$ IEC-IND</sup> mice receiving AAVs expressing mCherry (- HM3Dq) or HM3Dq (+ HM3Dq), with CNO injection (A-D), or without CNO injection (E and F). Data are expressed as the mean  $\pm$  SEM (the number of samples are indicated in the bar graph), with individual data points. Data were analyzed via two-way ANOVA. \* $P < 0.05$ , \*\* $P < 0.01$ , \*\*\* $P < 0.001$ , \*\*\*\* $P < 0.0001$ .

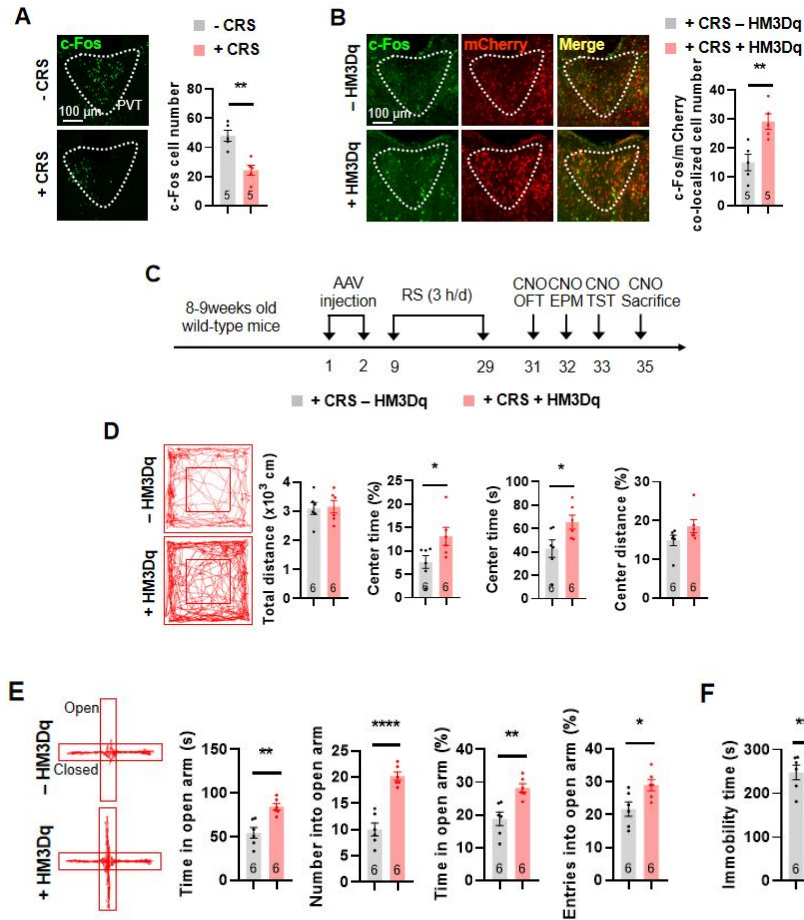

**Fig. S7 Activation of paraventricular thalamus (PVT) glutamatergic neurons resists to chronic restraint stress (CRS) induced stress-related behaviors.**

A. Immunofluorescence (IF) staining for c-Fos (green) in PVT (left) and quantification of c-Fos cell numbers (right) ( $t_8 = 4.597$ ,  $P = 0.0018$ ); D3V, dorsal 3rd ventricle.

B. IF staining for c-Fos (green), mCherry (red) or merge (yellow) in PVT (left), and quantification of c-Fos and mCherry colocalized cell numbers (right) ( $t_8 = 3.649$ ,  $P = 0.0065$ ).

C. Timeline of the behavioral tests. OFT, open field test; EPM, elevated plus maze test; TST, tail suspension test.

D. Representative tracks of mice in OFT, travel distance ( $t_{10} = 0.1943$ ,  $P = 0.8499$ ), percentage of time spent in center ( $t_{10} = 2.334$ ,  $P = 0.0417$ ), time spent in center ( $t_{10} = 2.362$ ,  $P = 0.0398$ ), and percentage of distance in center area (Mann Whitney test,  $P =$

0.0931).

E. Representative tracks of mice in EPM, the time spent in the open arms ( $t_{10} = 4.149$ ,  $P = 0.0020$ ), the number of entries into the open arms ( $t_{10} = 6.916$ ,  $P < 0.0001$ ), percentage of time spent in the open arms ( $t_{10} = 3.896$ ,  $P = 0.0030$ ), and percentage of entries into the open arms ( $t_{10} = 2.649$ ,  $P = 0.0244$ ).

F. Immobility time of tail suspension test (TST) ( $t_{10} = 5.232$ ,  $P = 0.0004$ ).

Studies for A were conducted using 8–9-week-old male wild-type (WT) mice with or without CRS; studies for B-F were conducted using 8–9-week-old male WT mice receiving AAVs expressing mCherry (- HM3Dq) or HM3Dq (+ HM3Dq), followed by CRS and CNO injection. Data are expressed as the mean  $\pm$  SEM (the number of samples are indicated in the bar graph), with individual data points. Data were analyzed via two-tailed unpaired Student's t test or specific test marked in the data. \* $P < 0.05$ , \*\* $P < 0.01$ , \*\*\* $P < 0.001$ , \*\*\*\* $P < 0.0001$ .

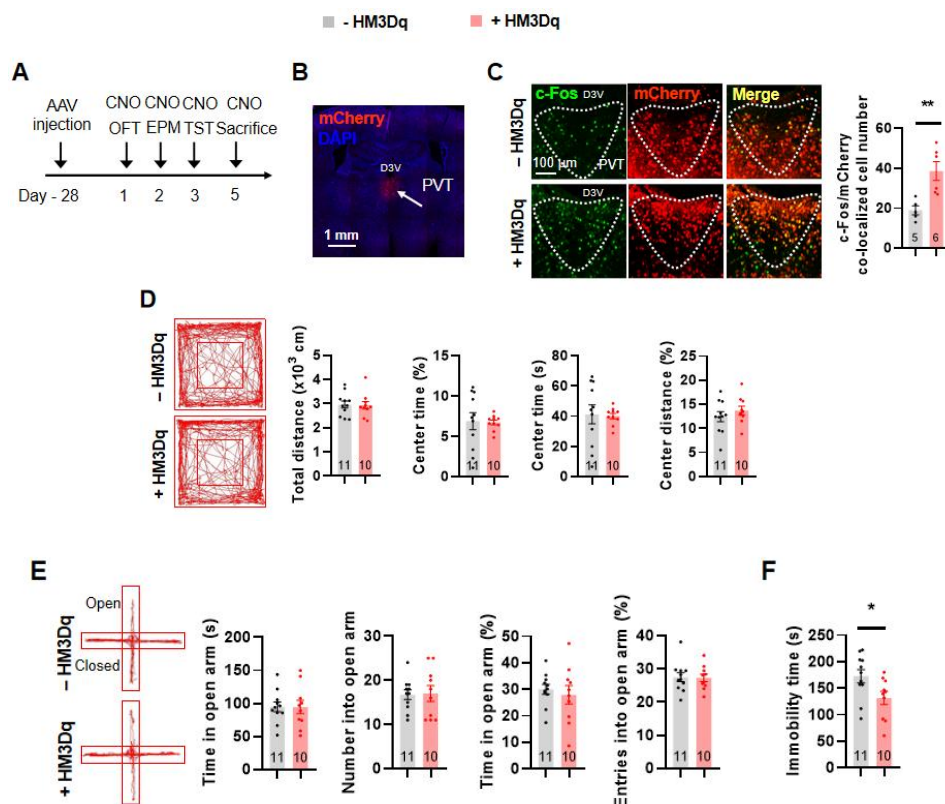

**Fig. S8 Chemogenetic activation of PVT in non-stressed animals has no effects with stress-related behavioral alterations.**

- A. Timeline of experiment procedure and the behavioral tests. OFT, open field test; EPM, elevated plus maze test; TST, tail suspension test.
- B. Post hoc visualization of mCherry (red) and DAPI (blue) in PVT of wild-type mice receiving AAV-CAMKII $\alpha$ -HM3Dq-mCherry stereotaxic injections; D3V, dorsal 3rd ventricle.
- C. Immunofluorescence (IF) staining for c-Fos (green), mCherry (red) or merge (yellow) in PVT (left), and quantification of c-Fos and mCherry colocalized cell numbers (right) ( $t_{19} = 3.499$ ,  $P = 0.0067$ ).
- D. Representative tracks of mice in OFT, travel distance ( $t_{19} = 0.1451$ ,  $P = 0.8861$ ), percentage of time spent in center (Unpaired t test with Welch's correction,  $t_{11.58} = 0.1473$ ,  $P = 0.8855$ ), time spent in center (Unpaired t test with Welch's correction,  $t_{11.62} = 0.1631$ ,  $P = 0.8733$ ), and percentage of distance in center area ( $t_{19} = 0.9327$ ,  $P = 0.3627$ ).
- E. Representative tracks of mice in EPM, the time spent in the open arms ( $t_{19} = 0.01298$ ,  $P = 0.9898$ ), the number of entries into the open arms ( $t_{19} = 0.1327$ ,  $P = 0.8958$ ), percentage of time spent in the open arms ( $t_{19} = 0.5384$ ,  $P = 0.5965$ ), and percentage of entries into the open arms ( $t_{19} = 0.1099$ ,  $P = 0.9136$ ).
- F. Immobility time of TST ( $t_{19} = 2.311$ ,  $P = 0.0322$ ).

Studies were conducted using 8–9-week-old male WT mice receiving AAVs expressing mCherry (- HM3Dq) or HM3Dq (+ HM3Dq), followed by CNO injection. Data are expressed as the mean  $\pm$  SEM (the number of samples are indicated in the bar graph), with individual data points. Data were analyzed via two-tailed unpaired Student's t test or specific test marked in the data.  $**P < 0.01$ .

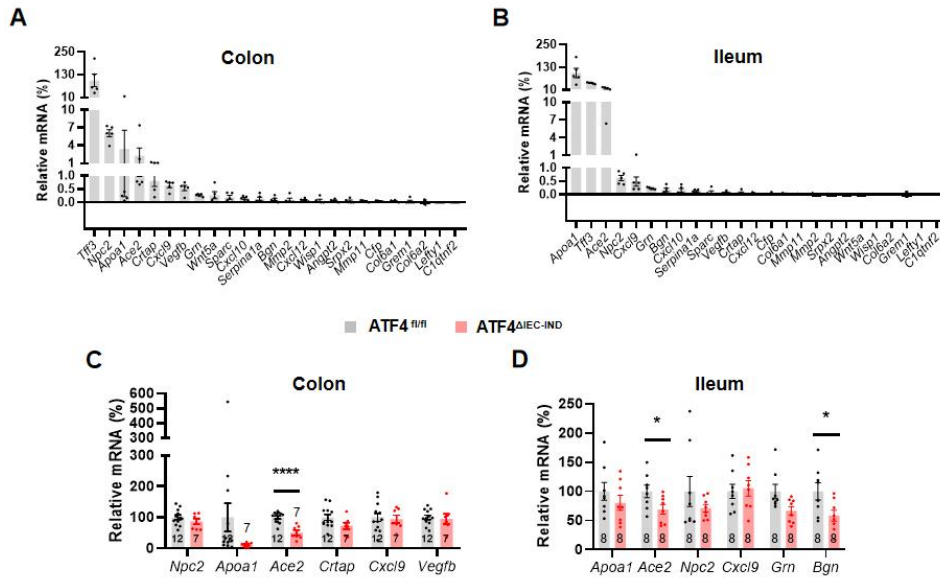

**Fig. S9 Gene expression of candidate genes in intestinal ATF4 knockout mice.**

A. Gene expression of 25 candidates in colonic epithelial cells by RT-PCR.

B. Gene expression of 25 candidates in ileal epithelial cells by RT-PCR.

C. Gene expression of *Npc2* ( $t_{17} = 1.078$ ,  $P = 0.2961$ ), *Apoa1* (Mann Whitney test,  $P = 0.0221$ ), *Ace2* ( $t_{17} = 5.439$ ,  $P < 0.0001$ ), *Crtap* ( $t_{17} = 1.790$ ,  $P = 0.0912$ ), *Cxcl9* ( $t_{17} = 0.2802$ ,  $P = 0.7827$ ) and *Vegfb* ( $t_{17} = 0.3359$ ,  $P = 0.7411$ ) in colonic epithelial cells by RT-PCR.

D. Gene expression of *Apoa1* ( $t_{14} = 0.9845$ ,  $P = 0.3416$ ), *Ace2* ( $t_{14} = 2.279$ ,  $P = 0.0389$ ), *Npc2* (Unpaired t test with Welch's correction,  $t_{7.865} = 1.089$ ,  $P = 0.3084$ ), *Cxcl9* ( $t_{14} = 0.2923$ ,  $P = 0.7743$ ), *Grn* (Mann Whitney test,  $P = 0.0650$ ) and *Bgn* ( $t_{14} = 2.393$ ,  $P = 0.0313$ ) in ileal epithelial cells by RT-PCR.

Studies for A and B were conducted using 8–9-week-old male wild-type mice; studies for C and D were conducted using 14–16-week-old male  $ATF4^{fl/fl}$  or  $ATF4^{\Delta IEC-IND}$  mice. Data are expressed as the mean  $\pm$  SEM ( $n = 5$  for A and B, the number of samples are indicated in the bar graph for C and D), with individual data points. Data were analyzed via two-tailed unpaired Student's t test or specific test marked in the data.  $*P < 0.05$ ,  $****P < 0.0001$ .

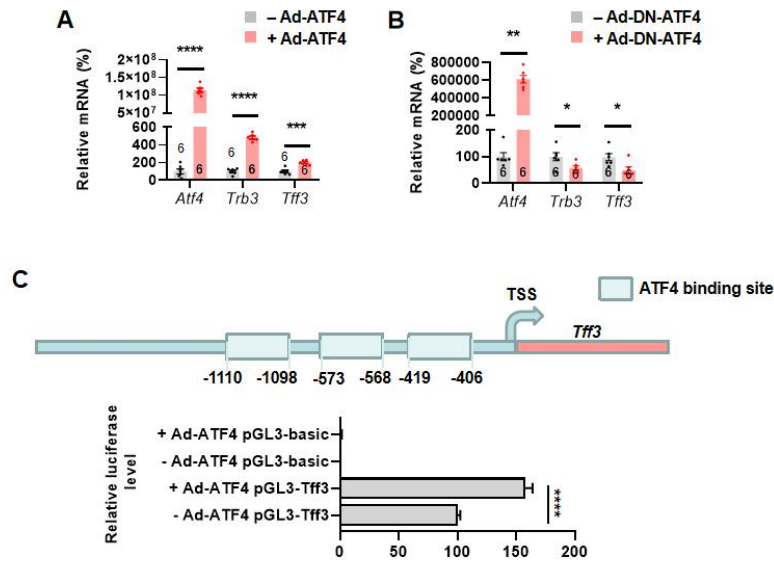

**Fig. S10 ATF4 regulates TFF3 expression directly in vitro.**

A. Gene expression of *Atf4* (Unpaired t test with Welch's correction,  $t_5 = 19.92$ ,  $P < 0.0001$ ), *Trb3* ( $t_{10} = 17.49$ ,  $P < 0.0001$ ) and *Tff3* ( $t_{10} = 5.717$ ,  $P = 0.0002$ ) by RT-PCR in CCD-841 cells infected with Ad-GFP (- Ad-ATF4) or Ad-ATF4 (+ Ad-ATF4).

B. Gene expression of *Atf4* (Mann Whitney test,  $P = 0.0022$ ), *Trb3* ( $t_{10} = 2.491$ ,  $P = 0.0319$ ) and *Tff3* ( $t_{10} = 2.662$ ,  $P = 0.0238$ ) by RT-PCR in CCD-841 cells infected with Ad-GFP (- Ad-DN-ATF4) or Ad-DN-ATF4 (+ Ad-DN-ATF4).

C. The ATF4 binding sites in the *Tff3* promoter (top) and luciferase activity assessed in CCD-841 cells expressing the *Tff3* promoter plasmid (pGL3-Tff3) or blank pGL3-basic plasmid (pGL3-basic), with Ad-GFP (- Ad-ATF4) or Ad-ATF4 (+ Ad-ATF4) infected (bottom).

Studies were conducted in CCD-841 cells with at least two independent experiments. Data are expressed as the mean  $\pm$  SEM (the number of samples are indicated in the bar graph), with individual data points. Data were analyzed via two-tailed unpaired Student's t test or specific test marked in the data. \* $P < 0.05$ , \*\*\* $P < 0.001$ , \*\*\*\* $P < 0.0001$ .



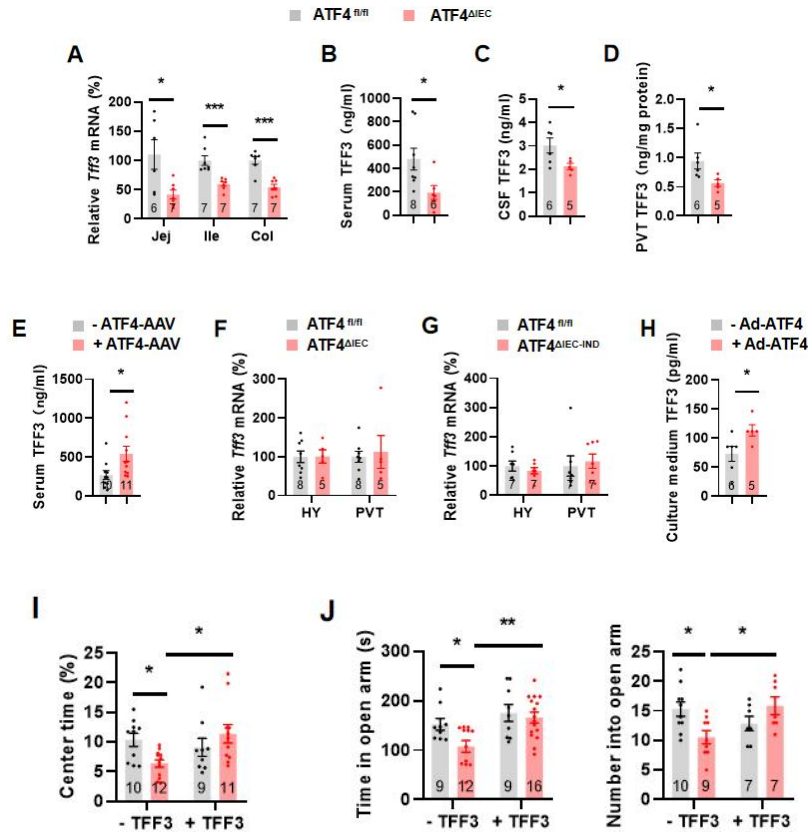

**Fig. S11 TFF3 levels in different tissues and different transgenic mice.**

A. Gene expression of *Tff3* in jejunal (Jej) (Unpaired t test with Welch's correction,  $t_{5.905} = 2.584$ ,  $P = 0.0422$ ), ileal (Ile) ( $t_{12} = 4.486$ ,  $P = 0.0007$ ) and colonic (Col) ( $t_{12} = 5.592$ ,  $P = 0.0001$ ) epithelial cells by RT-PCR.

B. TFF3 levels in serum by ELISA ( $t_{12} = 2.394$ ,  $P = 0.0339$ , CV of ATF4<sup>fl/fl</sup>: 54.55%, CV of ATF4<sup>ΔIEC</sup>: 74.54%).

C. TFF3 levels in cerebrospinal fluid (CSF) by ELISA ( $t_9 = 2.394$ ,  $P = 0.0403$ , CV of ATF4<sup>fl/fl</sup>: 26.05%, CV of ATF4<sup>ΔIEC</sup>: 13.43%).

D. TFF3 levels in the paraventricular thalamus (PVT) by ELISA ( $t_9 = 2.396$ ,  $P = 0.0401$ , CV of ATF4<sup>fl/fl</sup>: 35.39%, CV of ATF4<sup>ΔIEC</sup>: 21.70%).

E. TFF3 levels in serum by ELISA (Mann Whitney test,  $P = 0.0107$ , CV of -ATF4-AAV: 65.18%, CV of +ATF4-AAV: 59.68%).

F. Gene expression of *tff3* in hypothalamus (HY) ( $t_{11} = 0.03445$ ,  $P = 0.9731$ ) and PVT (Mann Whitney test,  $P = 0.5237$ ) by RT-PCR.

G. Gene expression of *tff3* in hypothalamus (HY) ( $t_{12} = 0.7755$ ,  $P = 0.4531$ ) and PVT (Mann Whitney test,  $P = 0.7095$ ) by RT-PCR.

H. TFF3 levels in culture medium by ELISA ( $t_9 = 2.383$ ,  $P = 0.0410$ , CV of - Ad-ATF4: 43.73%, CV of + Ad-ATF4: 19.26%).

I. Percentage of time spent in center in open field test (OFT) (Genotype Factor:  $F_{1,38} = 0.4814$ ,  $P = 0.4920$ ; TFF3 factor:  $F_{1,38} = 2.343$ ,  $P = 0.1341$ ; Genotype  $\times$  TFF3:  $F_{1,38} = 6.522$ ,  $P = 0.0148$ ).

J. The time spent in the open arms (Genotype Factor:  $F_{1,42} = 4.387$ ,  $P = 0.0423$ ; TFF3 factor:  $F_{1,42} = 9.758$ ,  $P = 0.0032$ ; Genotype  $\times$  TFF3:  $F_{1,42} = 1.857$ ,  $P = 0.1803$ ), the number of entries into the open arms (Genotype Factor:  $F_{1,29} = 0.4649$ ,  $P = 0.5007$ ; TFF3 factor:  $F_{1,29} = 1.249$ ,  $P = 0.2730$ ; Genotype  $\times$  TFF3:  $F_{1,29} = 9.164$ ,  $P = 0.0051$ ) in elevated plus maze test (EPM).

Studies for A-D, F were conducted using 8–9-week-old male ATF4<sup>fl/fl</sup> or ATF4 <sup>$\Delta$ IEC</sup> mice; studies for E were conducted using 8–9-week-old male Villin-Cre mice receiving colonic injection of AAVs expressing mCherry (- AAV-ATF4) or ATF4 (+ AAV-ATF4); studies for G were conducted using 14–16-week-old male ATF4<sup>fl/fl</sup> or ATF4 <sup>$\Delta$ IEC-IND</sup> mice; studies for H were conducted in CCD-841 cells with Ad-GFP (- Ad-ATF4) or Ad-ATF4 (+ Ad-ATF4) infected; studies for I and J were conducted using 14–16-week-old male ATF4<sup>fl/fl</sup> or ATF4 <sup>$\Delta$ IEC-IND</sup> mice receiving i.p. injection of saline (- TFF3) or TFF3 (+ TFF3). Data are expressed as the mean  $\pm$  SEM (the number of samples are indicated in the bar graph), with individual data points. Data were analyzed via two-tailed unpaired Student's t test for A-H, or via two-way ANOVA for I and J, or specific test marked in the data. \* $P < 0.05$ , \*\* $P < 0.01$ , \*\*\* $P < 0.001$ .

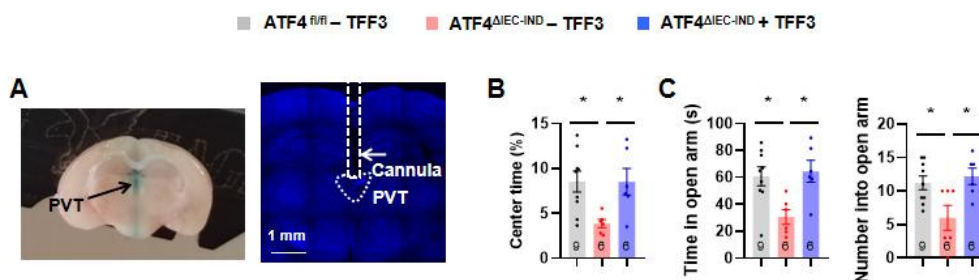

**Fig. S12 Behavioral alterations of paraventricular thalamus (PVT) injection of**

## TFF3 intestinal ATF4 deletion mice.

A. The photo of the green dye trace in the brain via PVT cannula injection (left) and post hoc visualization of DAPI (blue) in the brain of PVT cannula implantation (right).

B. Percentage of time spent in center in open field test (OFT) ( $F_{2,18} = 4.976$ ;  $P = 0.0190$ ).

C. The time spent in the open arms ( $F_{2,18} = 6.131$ ;  $P = 0.0093$ ), the number of entries into the open arms ( $F_{2,18} = 5.519$ ;  $P = 0.0135$ ) in elevated plus maze test (EPM).

Studies for A were conducted using 10-14-week-old male wild-type (WT) mice receiving PVT injection of green dye; studies for B and C were conducted using 12-14-week-old male  $ATF4^{fl/fl}$  or  $ATF4^{\Delta IEC-IND}$  mice receiving PVT injection of saline (- TFF3) or TFF3 (+ TFF3). Data are expressed as the mean  $\pm$  SEM (the number of samples are indicated in the bar graph), with individual data points. Data were analyzed via one-way ANOVA.  $*P < 0.05$ .

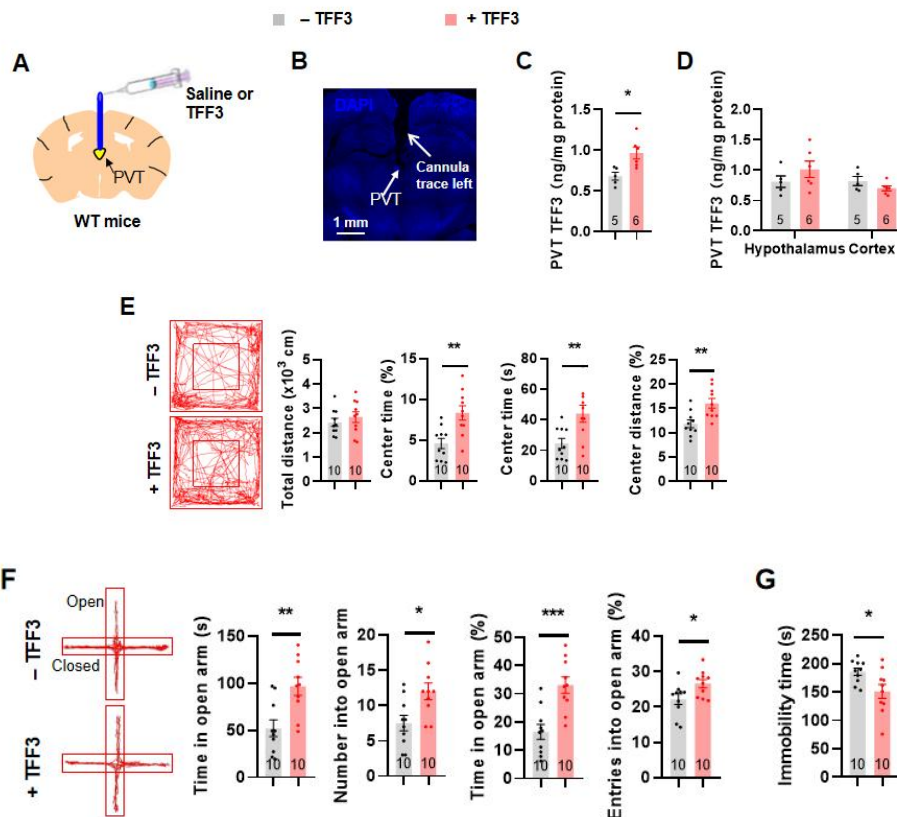

**Fig. S13 The behavioral changes of wild-type mice with paraventricular thalamus (PVT) injection of TFF3.**

- A. Schematic of PVT injection of TFF3 in wild-type (WT) mice.
- B. Post hoc visualization of DAPI (blue) in the brain of PVT cannula implantation.
- C. TFF3 levels in the PVT by ELISA ( $t_9 = 3.058$ ,  $P = 0.0136$ , CV of - TFF3: 16.07%, CV of + TFF3: 18.93%).
- D. TFF3 levels in hypothalamus ( $t_9 = 1.183$ ,  $P = 0.2672$ , CV of - TFF3: 25.86%, CV of + TFF3: 32.85%) and cortex ( $t_9 = 1.468$ ,  $P = 0.1761$ , CV of - TFF3: 20.23%, CV of + TFF3: 14.48%) by ELISA.
- E. Representative tracks of mice in OFT, travel distance ( $t_{18} = 0.7819$ ,  $P = 0.4445$ ), percentage of time spent in center ( $t_{18} = 3.479$ ,  $P = 0.0027$ ), time spent in center ( $t_{18} = 3.042$ ,  $P = 0.0070$ ), and percentage of distance in center area ( $t_{18} = 3.310$ ,  $P = 0.0039$ ).
- F. Representative tracks of mice in EPM, the time spent in the open arms ( $t_{18} = 3.401$ ,  $P = 0.0032$ ), the number of entries into the open arms ( $t_{18} = 2.812$ ,  $P = 0.0115$ ), percentage of time spent in the open arms ( $t_{18} = 4.204$ ,  $P = 0.0005$ ), and percentage of entries into the open arms ( $t_{18} = 2.336$ ,  $P = 0.0313$ ).
- G. Immobility time of TST ( $t_{18} = 2.506$ ,  $P = 0.0220$ ).

Studies were conducted using 8–9-week-old male WT mice receiving PVT injection of saline (- TFF3) or TFF3 (+ TFF3). Data are expressed as the mean  $\pm$  SEM (the number of samples are indicated in the bar graph), with individual data points. Data were analyzed via two-tailed unpaired Student's t test. \* $P < 0.05$ , \*\* $P < 0.01$ , \*\*\* $P < 0.001$ .

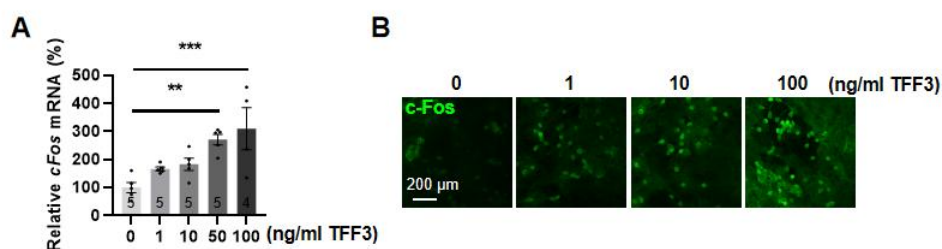

**Fig. S14 TFF3 treatment regulates c-Fos expression in vitro thalamic primary neurons.**

A. Gene expression of *c-Fos* in thalamic primary neurons by RT-PCR (Brown-Forsythe ANOVA test,  $F_{4,4.635} = 5.555$ ;  $P = 0.0498$ ).

B. Immunofluorescence (IF) staining for c-Fos (green) in thalamic primary neurons. Studies were conducted in thalamic primary neurons with TFF3 concentration gradient treatment. Data are expressed as the mean  $\pm$  SEM (the number of samples are indicated in the bar graph), with individual data points. Data were analyzed via Brown-Forsythe ANOVA test.  $**P < 0.01$ ,  $***P < 0.001$ .

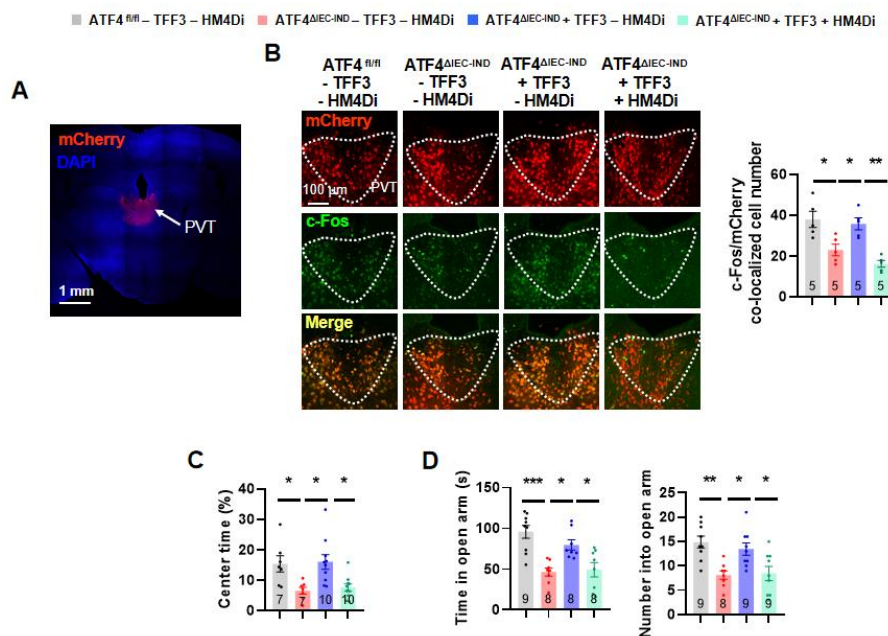

**Fig. S15 Immunofluorescence (IF) staining in the brain and behavioral effects of intestinal ATF4 knockout mice with HM4Di and TFF3 treatments.**

A. Post hoc visualization of mCherry (red) and DAPI (blue) in PVT of ATF4<sup>ΔIEC-IND</sup> mice receiving AAV-CAMKII $\alpha$ -HM4Di-mCherry stereotaxic injections; D3V, dorsal 3rd ventricle.

B. Immunofluorescence (IF) staining for c-Fos (green), mCherry (red) or merge (yellow) in PVT (left), and quantification of c-Fos and mCherry colocalized cell numbers (right) ( $F_{3,16} = 12.21$ ;  $P = 0.0002$ ).

C. Percentage of time spent in center in open field test (OFT) ( $F_{3,30} = 6.334$ ;  $P =$

0.0019).

D. The time spent in the open arms ( $F_{3,29} = 11.34$ ;  $P < 0.0001$ ), the number of entries into the open arms ( $F_{3,31} = 7.805$ ;  $P = 0.0005$ ) in elevated plus maze test (EPM).

Studies were conducted using 12–14-week-old male  $ATF4^{fl/fl}$  or  $ATF4^{\Delta IEC-IND}$  mice receiving AAVs expressing mCherry (- HM4Di) or HM4Di (+ HM4Di), followed by CNO and TFF3 i.p. injection. Data are expressed as the mean  $\pm$  SEM (the number of samples are indicated in the bar graph), with individual data points. Data were analyzed via one-way ANOVA. \* $P < 0.05$ , \*\* $P < 0.01$ , \*\*\* $P < 0.001$ .

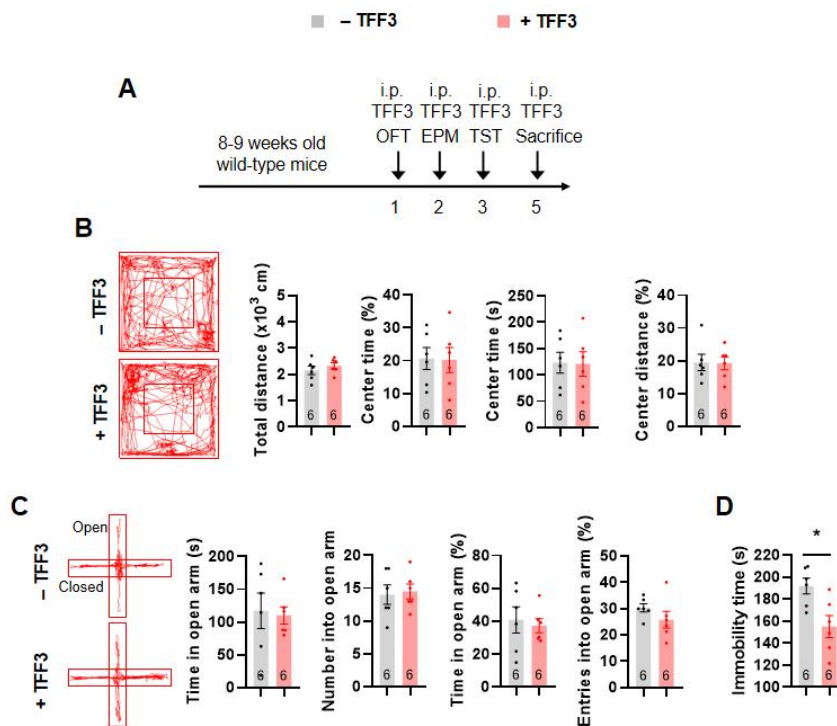

**Fig. S16 The behavioral changes of TFF3 i.p. injection of wild-type mice.**

A. Timeline of experiment procedure and the behavioral tests. OFT, open field test; EPM, elevated plus maze test; TST, tail suspension test.

B. Representative tracks of mice in OFT, travel distance ( $t_{10} = 0.8924$ ,  $P = 0.3931$ ), percentage of time spent in center ( $t_{10} = 0.08366$ ,  $P = 0.9350$ ), time spent in center ( $t_{10} = 0.07995$ ,  $P = 0.9379$ ), and percentage of distance in center area ( $t_{10} = 0.08124$ ,  $P = 0.9369$ ).

C. Representative tracks of mice in EPM, the time spent in the open arms ( $t_{10} = 0.2379$ ,  $P = 0.8167$ ), the number of entries into the open arms ( $t_{10} = 0.2666$ ,  $P = 0.7952$ ), percentage of time spent in the open arms ( $t_{10} = 0.3909$ ,  $P = 0.7041$ ), and percentage of entries into the open arms ( $t_{10} = 1.277$ ,  $P = 0.2305$ ).

D. Immobility time of TST ( $t_{10} = 2.966$ ,  $P = 0.0141$ ).

Studies were conducted using 8–9-week-old male wild-type mice receiving TFF3 i.p. injection. Data are expressed as the mean  $\pm$  SEM (the number of samples are indicated in the bar graph), with individual data points. Data were analyzed via two-tailed unpaired Student's t test.  $*P < 0.05$ .

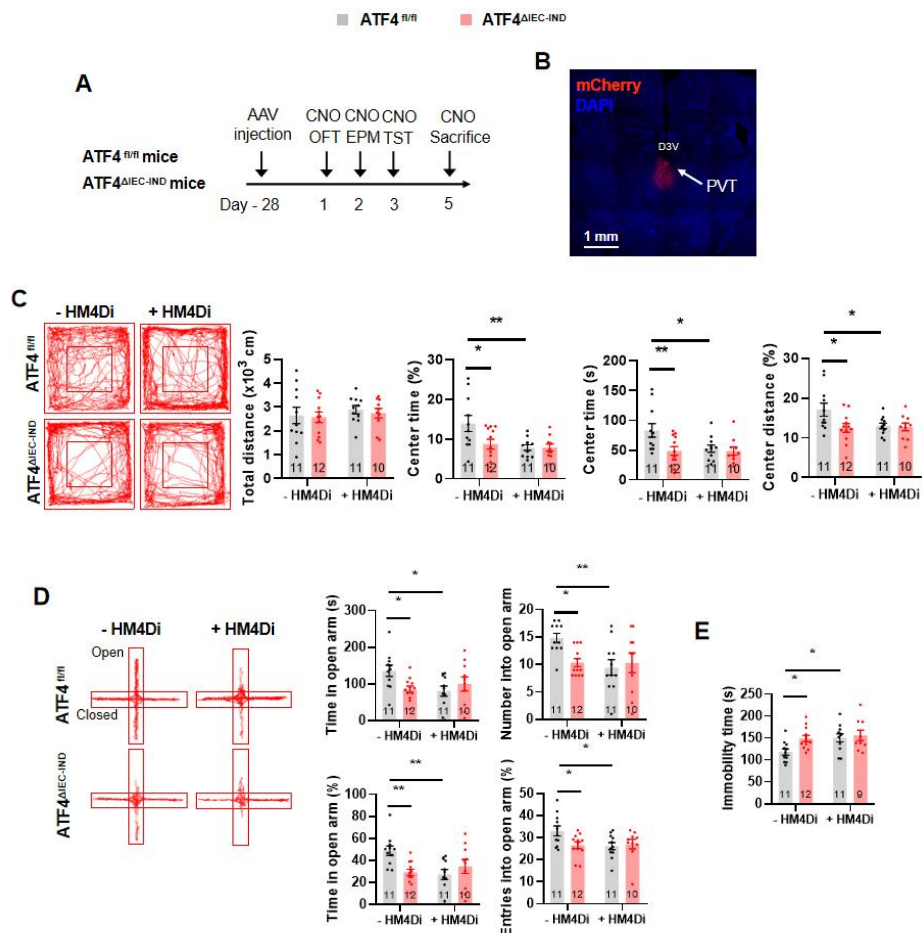

**Fig. S17 The behavioral changes of inducible intestinal ATF4 deletion mice with paraventricular thalamus (PVT) glutamatergic neurons inhibition.**

A. Timeline of experiment procedure and the behavioral tests. OFT, open field test; EPM, elevated plus maze test; TST, tail suspension test.

B. Post hoc visualization of mCherry (red) and DAPI (blue) in PVT of ATF4<sup>ΔIEC-IND</sup> mice receiving AAV-CAMKIIα-HM4Di-mCherry stereotaxic injections; D3V, dorsal 3rd ventricle.

C. Representative tracks of mice in OFT, travel distance (Genotype Factor:  $F_{1,40} = 0.2109$ ,  $P = 0.6485$ ; HM4Di factor:  $F_{1,40} = 0.7010$ ,  $P = 0.4074$ ; Genotype × HM4Di:  $F_{1,40} = 0.01985$ ,  $P = 0.8887$ ), percentage of time spent in center (Genotype Factor:  $F_{1,40} = 3.740$ ,  $P = 0.0602$ ; HM4Di factor:  $F_{1,40} = 6.629$ ,  $P = 0.0138$ ; Genotype × HM4Di:  $F_{1,40} = 3.736$ ,  $P = 0.0604$ ), time spent in center (Genotype Factor:  $F_{1,40} = 5.489$ ,  $P = 0.0242$ ; HM4Di factor:  $F_{1,40} = 3.498$ ,  $P = 0.0688$ ; Genotype × HM4Di:  $F_{1,40} = 3.518$ ,  $P = 0.0680$ ), and percentage of distance in center area (Genotype Factor:  $F_{1,40} = 4.380$ ,  $P = 0.0428$ ; HM4Di factor:  $F_{1,40} = 2.710$ ,  $P = 0.1076$ ; Genotype × HM4Di:  $F_{1,40} = 3.554$ ,  $P = 0.0667$ ).

D. Representative tracks of mice in EPM, the time spent in the open arms (Genotype Factor:  $F_{1,40} = 1.120$ ,  $P = 0.2963$ ; HM4Di factor:  $F_{1,40} = 2.024$ ,  $P = 0.1626$ ; Genotype × HM4Di:  $F_{1,40} = 5.824$ ,  $P = 0.0205$ ), the number of entries into the open arms (Genotype Factor:  $F_{1,40} = 2.195$ ,  $P = 0.1463$ ; HM4Di factor:  $F_{1,40} = 4.826$ ,  $P = 0.0339$ ; Genotype × HM4Di:  $F_{1,40} = 4.708$ ,  $P = 0.0360$ ), percentage of time spent in the open arms (Genotype Factor:  $F_{1,40} = 1.850$ ,  $P = 0.1814$ ; HM4Di factor:  $F_{1,40} = 3.102$ ,  $P = 0.0858$ ; Genotype × HM4Di:  $F_{1,40} = 8.893$ ,  $P = 0.0049$ ), and percentage of entries into the open arms (Genotype Factor:  $F_{1,40} = 2.186$ ,  $P = 0.1471$ ; HM4Di factor:  $F_{1,40} = 2.903$ ,  $P = 0.0962$ ; Genotype × HM4Di:  $F_{1,40} = 3.797$ ,  $P = 0.0584$ ).

E. Immobility time of TST (Genotype Factor:  $F_{1,39} = 4.227$ ,  $P = 0.0465$ ; HM4Di factor:  $F_{1,39} = 4.856$ ,  $P = 0.0335$ ; Genotype × HM4Di:  $F_{1,39} = 2.028$ ,  $P = 0.1624$ ).

Studies were conducted using 24–28-week-old male ATF4<sup>fl/fl</sup> or ATF4<sup>ΔIEC-IND</sup> mice receiving AAVs expressing mCherry (- HM4Di) or HM4Di (+ HM4Di), with CNO injection. Data are expressed as the mean ± SEM (the number of samples are indicated in the bar graph), with individual data points. Data were analyzed via two-way ANOVA. \* $P < 0.05$ , \*\* $P < 0.01$ .



**A** The full gels of the western bolts about the Fig. 1C

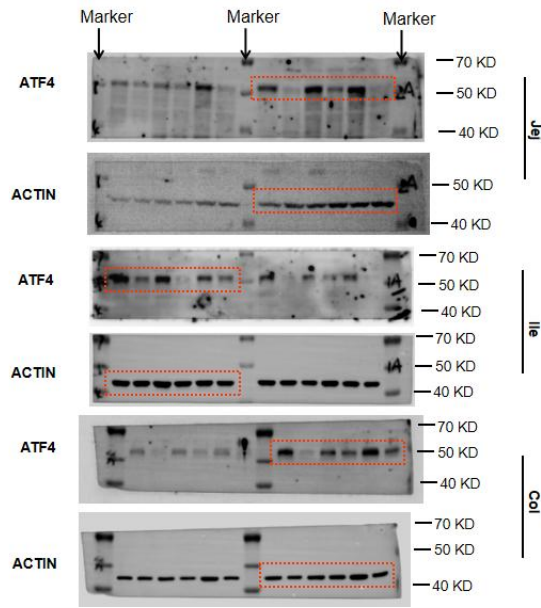

**B** The full gels of the western bolts about the Fig. 2B

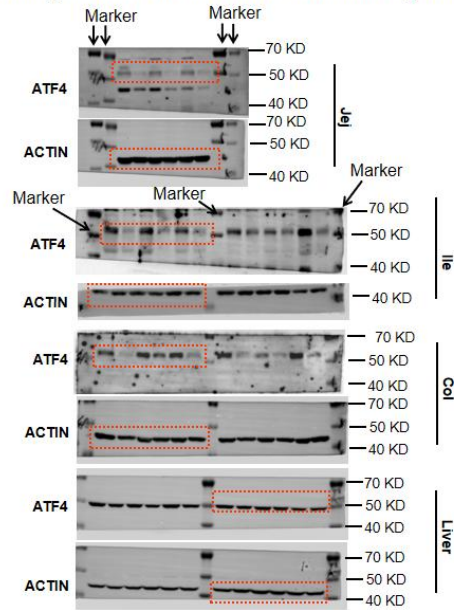

**C** The full gels of the western bolts about the Fig. S2B

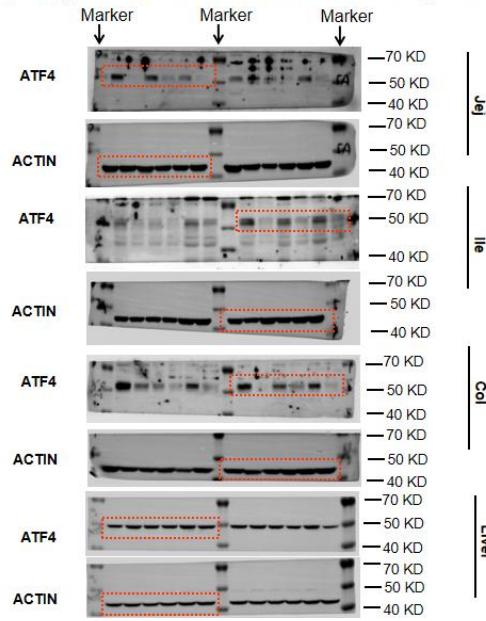

**Fig. S18** The full gels of the western bolts in the related Figures.

- A. The full gel of the western blots with molecular weight markers in Fig. 1C.
- B. The full gel of the western blots with molecular weight markers in Fig. 2B.
- C. The full gel of the western blots with molecular weight markers in Fig. S2B.

**Supplementary Table 1. Primers used for gene amplification.**

| Gene          | Direction | Primer sequence 5'→3' |
|---------------|-----------|-----------------------|
| <i>Atf4</i>   | F         | ATCTGGAGGTGGCCAAGCAC  |
|               | R         | TGGTTTCCAGGTCATCCATT  |
| <i>Atf4-2</i> | F         | ATCTGGAGGTGGCCAAGCAC  |
|               | R         | TGGTTTCCAGGTCATCCATT  |
| <i>Fos</i>    | F         | CCAGTCCTCACCTCTTCCAG  |
|               | R         | TCCAGCACCAGGTTAATTCC  |
| <i>Trb3</i>   | F         | TGTCTTGCGCACCTCAA     |
|               | R         | CCAGCTTCGTCCTCTCACAGT |
| <i>Tff3</i>   | F         | GCCCTCTGGCTAATGCTGTT  |

|                  |   |                         |
|------------------|---|-------------------------|
|                  | R | TTGGGATACTGGAGTCAAAGC   |
| <i>Gapdh</i>     | F | TGTGTCCGTCGTGGATCTGA    |
|                  | R | CCTGCTTCACCACCTTCTTGAT  |
| <i>Srpx2</i>     | F | ATGGTACGCAGGCTCAGGTTA   |
|                  | R | TGAGTAGCATGTGGCTTCTCC   |
| <i>Clqmf2</i>    | F | CTGACCCAATGCTTGGTGC     |
|                  | R | GCCCTTTGGTCCTTGTTTTCC   |
| <i>Col6a2</i>    | F | GCTCCTGATTGGGGACTCT     |
|                  | R | CCAACACGAAATACACGTTGAC  |
| <i>Crtap</i>     | F | TCACACCTATCTCCTGAAGCA   |
|                  | R | TGTCGGAAATGGACGTTCTCC   |
| <i>Mmp2</i>      | F | CCCATGAAGCCTTGTTTACCA   |
|                  | R | TGGAAGCGGAACGGAAACT     |
| <i>Col6a1</i>    | F | CTGCTGCTACAAGCCTGCT     |
|                  | R | CCCATAAGGTTTCAGCCTCA    |
| <i>Angpt2</i>    | F | CCTCGACTACGACGACTCAGT   |
|                  | R | TCTGCACCACATTCTGTTGGA   |
| <i>Wnt5a</i>     | F | CAACTGGCAGGACTTTCTCAA   |
|                  | R | CATCTCCGATGCCGGAACT     |
| <i>Apoa1</i>     | F | GGCACGTATGGCAGCAAGAT    |
|                  | R | CCAAGGAGGAGGATTCAAACCTG |
| <i>Grem1</i>     | F | CTGGGGACCCTACTGCCAA     |
|                  | R | TTTGCACCAATCTCGCTTCAG   |
| <i>Serpina1a</i> | F | TAGGGAGCAAGGGTGACACTC   |
|                  | R | ACTGTCTGGTCTGTTGAGGGT   |
| <i>Sparc</i>     | F | GTGGAAATGGGAGAATTTGAGGA |
|                  | R | CTCACACACCTTGCCATGTTT   |
| <i>Mmp11</i>     | F | CCGGAGAGTCACCGTCATC     |
|                  | R | GCAGGACTAGGGACCCAATG    |

|               |   |                          |
|---------------|---|--------------------------|
| <i>Wisp1</i>  | F | CAGCACCCTAGAGGAAACGA     |
|               | R | CTGGGCACATATCTTACAGCATT  |
| <i>Cxcl9</i>  | F | GGAGTTCGAGGAACCCTAGTG    |
|               | R | GGGATTTGTAGTGGATCGTGC    |
| <i>Cxcl12</i> | F | TGCATCAGTGACGGTAAACCA    |
|               | R | TTCTTCAGCCGTGCAACAATC    |
| <i>Lefty1</i> | F | CCAACCGCACTGCCCTTAT      |
|               | R | CGCGAAACGAACCAACTTGT     |
| <i>Npc2</i>   | F | AGGACTGCGGCTCTAAGGT      |
|               | R | AGGCTCAGGAATAGGGAAGGG    |
| <i>Cxcl10</i> | F | CCAAGTGCTGCCGTCATTTTC    |
|               | R | GGCTCGCAGGGATGATTTCAA    |
| <i>Vegfb</i>  | F | GCCAGACAGGGTTGCCATAC     |
|               | R | GGAGTGGGATGGATGATGTCAG   |
| <i>Bgn</i>    | F | TGCCATGTGTCCTTTCGGTT     |
|               | R | CAGGTCTAGCAGTGTGGTGTC    |
| <i>Ace2</i>   | F | TCCAGACTCCGATCATCAAGC    |
|               | R | GCTCATGGTGTTTCAGAATTGTGT |
| <i>Grn</i>    | F | ATGTGGGTCCTGATGAGCTG     |
|               | R | GCTCGTTATTCTAGGCCATGTG   |
| <i>Cfp</i>    | F | TTCACCCAGTATGAGGAGTCC    |
|               | R | GCTGACCATTGTGGAGACCT     |

**Supplementary Table 2. Normality of distribution, equal variances, t/F values and degree of freedom of the data.**

| Panel of Data | Normality of distribution? | Equal variances? | t values (t test) or F values (ANOVA) | Total Degree of freedom |
|---------------|----------------------------|------------------|---------------------------------------|-------------------------|
| Fig.1B Jej    | yes;yes                    | yes              | 3.531                                 | 8                       |
| Fig. 1B Ile   | yes;yes                    | yes              | 2.926                                 | 8                       |
| Fig. 1B Col   | no;yes                     | no               | —                                     | —                       |

|                                   |                |     |                                                                                                                                |          |
|-----------------------------------|----------------|-----|--------------------------------------------------------------------------------------------------------------------------------|----------|
| Fig.1C Jej                        | yes;yes        | yes | 2.687                                                                                                                          | 11       |
| Fig. 1C Ile                       | yes;yes        | yes | 3.323                                                                                                                          | 11       |
| Fig. 1C Col                       | yes;yes        | yes | 2.729                                                                                                                          | 11       |
| Fig.1E Total distance             | yes;yes        | yes | 0.0771                                                                                                                         | 19       |
| Fig.1E Center time (s)            | yes;yes        | yes | 2.425                                                                                                                          | 19       |
| Fig. 1E Center distance (%)       | yes;yes        | yes | 2.251                                                                                                                          | 19       |
| Fig. 1F Time in open arm (%)      | yes;yes        | yes | 3.596                                                                                                                          | 19       |
| Fig. 1F Entries into open arm (%) | yes;yes        | yes | 2.529                                                                                                                          | 19       |
| Fig. 1G                           | yes;yes        | yes | 2.684                                                                                                                          | 19       |
| Fig.1H Total distance             | yes;yes        | yes | 1.488                                                                                                                          | 17       |
| Fig.1H Center time (s)            | yes;yes        | yes | 2.367                                                                                                                          | 17       |
| Fig. 1H Center distance (%)       | yes;yes        | yes | 2.4                                                                                                                            | 17       |
| Fig. 1I Time in open arm (%)      | yes;yes        | yes | 0.6447                                                                                                                         | 18       |
| Fig. 1I Entries into open arm (%) | yes;yes        | yes | 0.02775                                                                                                                        | 18       |
| Fig. 1J                           | yes;yes        | yes | 4.204                                                                                                                          | 17       |
| Fig. 2A Jej                       | yes;yes        | no  | 11.04                                                                                                                          | 9.285    |
| Fig. 2A Ile                       | yes;yes        | no  | 12.24                                                                                                                          | 9.174    |
| Fig. 2A Col                       | yes;yes        | yes | 5.288                                                                                                                          | 12       |
| Fig. 2A Liver                     | yes;yes        | yes | 0.3067                                                                                                                         | 13       |
| Fig. 2B Jej                       | yes;yes        | yes | 8.774                                                                                                                          | 10       |
| Fig. 2B Ile                       | yes;yes        | yes | 8.615                                                                                                                          | 10       |
| Fig. 2B Col                       | yes;yes        | no  | 9.894                                                                                                                          | 5.713    |
| Fig. 2B Liver                     | yes;yes        | yes | 0.4219                                                                                                                         | 10       |
| Fig.2D Total distance             | yes;yes        | yes | 0.4083                                                                                                                         | 20       |
| Fig.2D Center time (s)            | yes;yes        | yes | 4.647                                                                                                                          | 20       |
| Fig. 2D Center distance (%)       | yes;yes        | yes | 3.867                                                                                                                          | 20       |
| Fig. 2E Time in open arm (%)      | yes;yes        | no  | 3.519                                                                                                                          | 13.28    |
| Fig. 2E Entries into open arm (%) | yes;yes        | yes | 3.617                                                                                                                          | 20       |
| Fig. 2F                           | yes;yes        | yes | 2.409                                                                                                                          | 10       |
| Fig. 3A                           | yes;yes        | yes | 3.213                                                                                                                          | 8        |
| Fig. 3B                           | yes;yes        | yes | 2.748                                                                                                                          | 10       |
| Fig. 3D Total distance            | all-yes        | yes | Genotype Factor: $F_{1,35} = 0.01699$ ;<br>HM3Dq factor: $F_{1,35} = 0.5218$ ;<br>Genotype $\times$ HM3Dq: $F_{1,35} = 0.4704$ | total=38 |
| Fig. 3D Center time (s)           | yes,yes,no,yes | yes | Genotype Factor: $F_{1,31} = 0.885$ ;<br>HM3Dq factor: $F_{1,31} = 3.067$ ;<br>Genotype $\times$ HM3Dq: $F_{1,31} = 5.286$     | total=34 |
| Fig. 3D Center distance (%)       | all-yes        | yes | Genotype Factor: $F_{1,30} = 3.866$ ;<br>HM3Dq factor: $F_{1,30} = 4.824$ ;<br>Genotype $\times$ HM3Dq: $F_{1,30} = 6.279$     | total=33 |

|                                          |                |     |                                                                                                                                  |          |
|------------------------------------------|----------------|-----|----------------------------------------------------------------------------------------------------------------------------------|----------|
| <b>Fig. 3E Time in open arm (%)</b>      | all-yes        | yes | Genotype Factor: $F_{1,24} = 4.114$ ;<br>HM3Dq factor: $F_{1,24} = 6.458$ ;<br>Genotype $\times$ HM3Dq: $F_{1,24} = 2.875$       | total=27 |
| <b>Fig. 3E Entries into open arm (%)</b> | all-yes        | yes | Genotype Factor: $F_{1,24} = 4.435$ ;<br>HM3Dq factor: $F_{1,24} = 5.363$ ;<br>Genotype $\times$ HM3Dq: $F_{1,24} = 3.373$       | total=27 |
| <b>Fig. 3F</b>                           | all-yes        | yes | Genotype Factor: $F_{1,24} = 5.006$ ;<br>HM3Dq factor: $F_{1,24} = 4.436$ ;<br>Genotype $\times$ HM3Dq: $F_{1,24} = 7.477$       | total=27 |
| <b>Fig. 4B Jej</b>                       | yes,yes        | yes | 2.968                                                                                                                            | 10       |
| <b>Fig. 4B Ile</b>                       | yes,yes        | yes | 3.591                                                                                                                            | 10       |
| <b>Fig. 4B Col</b>                       | no,yes         | no  | —                                                                                                                                | —        |
| <b>Fig. 4C</b>                           | yes,yes        | yes | 2.692                                                                                                                            | 12       |
| <b>Fig. 4D</b>                           | yes,yes        | yes | 3.941                                                                                                                            | 9        |
| <b>Fig. 4E</b>                           | yes,yes        | yes | 2.945                                                                                                                            | 9        |
| <b>Fig. 4F</b>                           | all-yes        | yes | Genotype Factor: $F_{1,16} = 3.068$ ;<br>TFF3 factor: $F_{1,16} = 8.243$ ;<br>Genotype $\times$ TFF3: $F_{1,16} = 7.311$         | total=19 |
| <b>Fig. 4H Total distance</b>            | all-yes        | yes | Genotype Factor: $F_{1,38} = 0.2085$ ;<br>TFF3 factor: $F_{1,38} = 0.05511$ ;<br>Genotype $\times$ TFF3: $F_{1,38} = 6.033e-005$ | total=41 |
| <b>Fig. 4H Center time (s)</b>           | all-yes        | yes | Genotype Factor: $F_{1,38} = 1.595$ ;<br>TFF3 factor: $F_{1,38} = 3.336$ ;<br>Genotype $\times$ TFF3: $F_{1,38} = 4.781$         | total=41 |
| <b>Fig. 3H Center distance (%)</b>       | all-yes        | no  | Genotype Factor: $F_{1,38} = 1.044$ ;<br>TFF3 factor: $F_{1,38} = 5.912$ ;<br>Genotype $\times$ TFF3: $F_{1,38} = 6.511$         | total=41 |
| <b>Fig.4I Time in open arm (%)</b>       | all-yes        | yes | Genotype Factor: $F_{1,42} = 4.330$ ;<br>TFF3 factor: $F_{1,42} = 9.751$ ;<br>Genotype $\times$ TFF3: $F_{1,42} = 1.801$         | total=45 |
| <b>Fig.4I Entries into open arm (%)</b>  | yes,yes,no,yes | yes | Genotype Factor: $F_{1,29} = 4.784$ ;<br>TFF3 factor: $F_{1,29} = 2.426$ ;<br>Genotype $\times$ TFF3: $F_{1,29} = 3.737$         | total=32 |
| <b>Fig.4J</b>                            | all-yes        | yes | Genotype Factor: $F_{1,42} = 10.73$ ;<br>TFF3 factor: $F_{1,42} = 13.03$ ;<br>Genotype $\times$ TFF3: $F_{1,42} = 1.091$         | total=45 |
| <b>Fig.5C</b>                            | all-yes        | yes | $F_{2,23} = 3.886$                                                                                                               | total=25 |
| <b>Fig.5D Total distance</b>             | all-yes        | yes | $F_{2,18} = 1.182$                                                                                                               | total=20 |
| <b>Fig. 5D Center time (s)</b>           | all-yes        | yes | $F_{2,18} = 5.074$                                                                                                               | total=20 |
| <b>Fig. 5D Center distance (%)</b>       | no, yes, yes   | yes |                                                                                                                                  |          |

|                                  |         |     |                             |             |
|----------------------------------|---------|-----|-----------------------------|-------------|
| Fig.5E Time in open arm (%)      | all-yes | yes | $F_{2,18} = 14.37$          | total=20    |
| Fig.5E Entries into open arm (%) | all-yes | yes | $F_{2,18} = 12.32$          | total=20    |
| Fig.5F                           | all-yes | yes | $F_{2,18} = 6.345$          | total=20    |
| Fig.6A                           | all-yes | yes | $F_{2,12} = 15.17$          | total=14    |
| Fig.6C Total distance            | all-yes | no  | $F_{3,000,21.48}^* = 1.289$ | total=24.48 |
| Fig. 6C Center time (s)          | all-yes | yes | $F_{3,31} = 7.131$          | total=34    |
| Fig. 6C Center distance (%)      | all-yes | yes | $F_{3,32} = 7.854$          | total=35    |
| Fig.6D Time in open arm (%)      | all-yes | yes | $F_{3,31} = 7.916$          | total=34    |
| Fig.6D Entries into open arm (%) | all-yes | yes | $F_{3,31} = 7.815$          | total=34    |
| Fig.6E                           | all-yes | yes | $F_{3,36} = 9.359$          | total=39    |

| Panel of Data                      | Normality of distribution? | Equal variances? | t values (t test) or F values (ANOVA)                                        | Total Degree of freedom |
|------------------------------------|----------------------------|------------------|------------------------------------------------------------------------------|-------------------------|
| Fig. S1A Total distance            | yes, yes                   | no               | 1.368                                                                        | 12.67                   |
| Fig. S1A Center time (%)           | yes, yes                   | yes              | 2.287                                                                        | 16                      |
| Fig. S1A Center time (s)           | yes, yes                   | yes              | 2.287                                                                        | 16                      |
| Fig. S1A Center distance (%)       | yes, yes                   | yes              | 2.806                                                                        | 16                      |
| Fig. S1B Time in open arm (s)      | yes, yes                   | yes              | 6.769                                                                        | 17                      |
| Fig. S1B Number into open arm      | yes, yes                   | yes              | 2.32                                                                         | 17                      |
| Fig. S1B Time in open arm (%)      | yes, yes                   | yes              | 6.96                                                                         | 17                      |
| Fig. S1B Entries into open arm (%) | yes, yes                   | yes              | 4.078                                                                        | 17                      |
| Fig. S1C                           | yes, yes                   | yes              | 3.405                                                                        | 16                      |
| Fig. S1D Liver                     | yes, yes                   | no               | 1.178                                                                        | 9.422                   |
| Fig. S1D Jej                       | yes, yes                   | yes              | 0.9478                                                                       | 16                      |
| Fig. S1D Ile                       | yes, yes                   | yes              | 1.157                                                                        | 16                      |
| Fig. S1D Col                       | yes, no                    | yes              | —                                                                            | —                       |
| Fig. S1F Aft4                      | yes, yes                   | yes              | 5.319                                                                        | 19                      |
| Fig. S1F Trb3                      | yes, yes                   | no               | 3.043                                                                        | 9.086                   |
| Fig. S1F Ddit4                     | no, no                     | no               | —                                                                            | —                       |
| Fig. S1G Center time (%)           | yes, yes                   | yes              | 2.426                                                                        | 19                      |
| Fig. S1H Time in open arm (s)      | yes, yes                   | yes              | 3.636                                                                        | 19                      |
| Fig. S1H Number into open arm      | yes, yes                   | yes              | 3.095                                                                        | 19                      |
| Fig. S1I Center time (%)           | yes, yes                   | yes              | 2.363                                                                        | 17                      |
| Fig. S1J Time in open arm (s)      | yes, yes                   | yes              | 0.5953                                                                       | 18                      |
| Fig. S1J Number into open arm      | yes, yes                   | yes              | 0.6591                                                                       | 18                      |
| Fig. S1K                           | all-yes                    | yes              | Adenovirus Factor: $F_{1,44} = 0.6048$ ;<br>CRS factor: $F_{1,44} = 1.052$ ; | total=47                |

|                                           |          |     |                                                                                                                        |          |
|-------------------------------------------|----------|-----|------------------------------------------------------------------------------------------------------------------------|----------|
|                                           |          |     | Adenovirus × CRS: $F_{i,44} = 0.02925$                                                                                 |          |
| <b>Fig. S1L</b>                           | all-yes  | yes | Adenovirus Factor: $F_{i,44} = 0.06367$ ;<br>CRS factor: $F_{i,44} = 13.44$ ;<br>Adenovirus × CRS: $F_{i,44} = 0.7795$ | total=47 |
| <b>Fig. S2A Jej</b>                       | yes, yes | yes | 7.463                                                                                                                  | 11       |
| <b>Fig. S2A Ile</b>                       | yes, yes | yes | 7.625                                                                                                                  | 11       |
| <b>Fig. S2A Col</b>                       | no, no   | yes | —                                                                                                                      | —        |
| <b>Fig. S2A Liver</b>                     | yes, yes | yes | 0.08589                                                                                                                | 11       |
| <b>Fig. S2B Jej</b>                       | yes, yes | yes | 3.887                                                                                                                  | 10       |
| <b>Fig. S2B Ile</b>                       | yes, yes | yes | 3.971                                                                                                                  | 10       |
| <b>Fig. S2B Col</b>                       | yes, no  | yes | —                                                                                                                      | —        |
| <b>Fig. S2B Liver</b>                     | yes, yes | yes | 0.2664                                                                                                                 | 10       |
| <b>Fig. S2D Total distance</b>            | yes, yes | yes | 0.4957                                                                                                                 | 15       |
| <b>Fig. S2D Center time (%)</b>           | yes, yes | yes | 4.857                                                                                                                  | 15       |
| <b>Fig. S2D Center time (s)</b>           | yes, yes | yes | 3.077                                                                                                                  | 15       |
| <b>Fig. S2D Center distance (%)</b>       | yes, yes | yes | 2.44                                                                                                                   | 15       |
| <b>Fig. S2E Time in open arm (s)</b>      | yes, yes | yes | 3.038                                                                                                                  | 15       |
| <b>Fig. S2E Number into open arm</b>      | yes, yes | no  | 2.272                                                                                                                  | 9.559    |
| <b>Fig. S2E Time in open arm (%)</b>      | yes, yes | yes | 3.335                                                                                                                  | 15       |
| <b>Fig. S2E Entries into open arm (%)</b> | yes, yes | yes | 2.699                                                                                                                  | 15       |
| <b>Fig. S2F</b>                           | yes, yes | yes | 5.78                                                                                                                   | 15       |
| <b>Fig. S3A Center time (%)</b>           | yes, yes | yes | 4.269                                                                                                                  | 20       |
| <b>Fig. S3B Time in open arm (s)</b>      | yes, no  | no  | —                                                                                                                      | —        |
| <b>Fig. S3B Number into open arm</b>      | yes, yes | no  | 2.368                                                                                                                  | 13.3     |
| <b>Fig. S3D</b>                           | yes, yes | yes | 3.121                                                                                                                  | 22       |
| <b>Fig. S3E</b>                           | yes, yes | yes | 4.026                                                                                                                  | 22       |
| <b>Fig. S3H</b>                           | yes, yes | no  | 0.5048                                                                                                                 | 16.27    |
| <b>Fig. S3I SI</b>                        | yes, yes | yes | 1.177                                                                                                                  | 14       |
| <b>Fig. S3I LI</b>                        | yes, yes | yes | 1.005                                                                                                                  | 14       |
| <b>Fig. S3K II1b</b>                      | yes, yes | yes | 1.344                                                                                                                  | 11       |
| <b>Fig. S3K II6</b>                       | no, yes  | yes | —                                                                                                                      | —        |
| <b>Fig. S3K Tnfa</b>                      | no, yes  | yes | —                                                                                                                      | —        |
| <b>Fig. S4A PVN</b>                       | yes, yes | yes | 2.479                                                                                                                  | 9        |
| <b>Fig. S4A MeA</b>                       | yes, no  | yes | —                                                                                                                      | —        |
| <b>Fig. S4A CeA</b>                       | yes, yes | yes | 0.3443                                                                                                                 | 9        |
| <b>Fig. S4A BLA</b>                       | yes, yes | yes | 3.686                                                                                                                  | 9        |
| <b>Fig. S4B</b>                           | yes, yes | yes | 3.092                                                                                                                  | 9        |
| <b>Fig. S4C PVN</b>                       | yes, yes | yes | 0.269                                                                                                                  | 10       |
| <b>Fig. S4C MeA</b>                       | yes, yes | yes | 1.252                                                                                                                  | 10       |
| <b>Fig. S4C CeA</b>                       | yes, yes | yes | 0.6847                                                                                                                 | 10       |
| <b>Fig. S4C BLA</b>                       | yes, yes | yes | 2.416                                                                                                                  | 10       |



|                                           |                   |     |                                                                                                                                 |          |
|-------------------------------------------|-------------------|-----|---------------------------------------------------------------------------------------------------------------------------------|----------|
| <b>Fig. S4D</b>                           | yes, yes          | yes | 5.472                                                                                                                           | 10       |
| <b>Fig. S5C</b>                           | yes, yes          | yes | 7.556                                                                                                                           | 8        |
| <b>Fig. S5D Total distance</b>            | yes, yes          | yes | 1.581                                                                                                                           | 10       |
| <b>Fig. S5D Center time (%)</b>           | yes, yes          | yes | 3.807                                                                                                                           | 10       |
| <b>Fig. S5D Center time (s)</b>           | yes, yes          | yes | 2.719                                                                                                                           | 10       |
| <b>Fig. S5D Center distance (%)</b>       | yes, yes          | yes | 2.214                                                                                                                           | 10       |
| <b>Fig. S5E Time in open arm (s)</b>      | no, yes           | yes | —                                                                                                                               | —        |
| <b>Fig. S5E Number into open arm</b>      | yes, yes          | yes | 4.009                                                                                                                           | 10       |
| <b>Fig. S5E Time in open arm (%)</b>      | yes, yes          | yes | 5.536                                                                                                                           | 10       |
| <b>Fig. S5E Entries into open arm (%)</b> | yes, yes          | yes | 4.129                                                                                                                           | 10       |
| <b>Fig. S5F</b>                           | yes, yes          | yes | 2.449                                                                                                                           | 10       |
| <b>Fig. S6B</b>                           | all-yes           | yes | Genotype Factor: $F_{1,16} = 6.957$ ;<br>HM3Dq factor: $F_{1,16} = 46.93$ ;<br>Genotype $\times$ HM3Dq: $F_{1,16} = 4.360$      | total=19 |
| <b>Fig. S6C Center time (%)</b>           | yes, yes, no, yes | yes | Genotype Factor: $F_{1,29} = 2.145$ ;<br>HM3Dq factor: $F_{1,29} = 1.841$ ;<br>Genotype $\times$ HM3Dq: $F_{1,29} = 7.147$      | total=32 |
| <b>Fig. S6D Time in open arm (s)</b>      | yes, yes, yes, no | yes | Genotype Factor: $F_{1,24} = 3.561$ ;<br>HM3Dq factor: $F_{1,24} = 8.223$ ;<br>Genotype $\times$ HM3Dq: $F_{1,24} = 4.445$      | total=27 |
| <b>Fig. S6D Number into open arm</b>      | no, yes, yes, yes | yes | Genotype Factor: $F_{1,25} = 1.162$ ;<br>HM3Dq factor: $F_{1,25} = 1.958$ ;<br>Genotype $\times$ HM3Dq: $F_{1,25} = 8.900$      | total=28 |
| <b>Fig. S6E Total distance</b>            | all-yes           | yes | Genotype Factor: $F_{1,34} = 2.112$ ;<br>HM3Dq factor: $F_{1,34} = 8.248$ ;<br>Genotype $\times$ HM3Dq: $F_{1,34} = 0.8104$     | total=37 |
| <b>Fig. S6E Center time (%)</b>           | all-yes           | yes | Genotype Factor: $F_{1,26} = 17.81$ ;<br>HM3Dq factor: $F_{1,26} = 0.07846$ ;<br>Genotype $\times$ HM3Dq: $F_{1,26} = 0.009319$ | total=29 |
| <b>Fig. S6E Center time (s)</b>           | all-yes           | yes | Genotype Factor: $F_{1,26} = 18.54$ ; HM3Dq<br>factor: $F_{1,26} = 0.01205$ ; Genotype $\times$<br>HM3Dq: $F_{1,26} = 0.003922$ | total=29 |
| <b>Fig. S6E Center distance (%)</b>       | all-yes           | yes | Genotype Factor: $F_{1,28} = 22.61$ ;<br>HM3Dq factor: $F_{1,28} = 0.01271$ ;<br>Genotype $\times$ HM3Dq: $F_{1,28} = 0.01376$  | total=31 |
| <b>Fig. S6F Time in open arm (s)</b>      | all-yes           | yes | Genotype Factor: $F_{1,26} = 32.63$ ;<br>HM3Dq factor: $F_{1,26} = 0.08644$ ;<br>Genotype $\times$ HM3Dq: $F_{1,26} = 0.06746$  | total=29 |
| <b>Fig. S6F Number into open arm</b>      | all-yes           | no  | Genotype Factor: $F_{1,24} = 18.88$ ;<br>HM3Dq factor: $F_{1,24} = 0.9032$ ;<br>Genotype $\times$ HM3Dq: $F_{1,24} = 0.07373$   | total=27 |
| <b>Fig. S6F Time in open arm (%)</b>      | all-yes           | yes | Genotype Factor: $F_{1,26} = 37.18$ ; HM3Dq<br>factor: $F_{1,26} = 0.002266$ ;                                                  | total=29 |

|                                           |          |     |                                                                                                                        |          |
|-------------------------------------------|----------|-----|------------------------------------------------------------------------------------------------------------------------|----------|
|                                           |          |     | Genotype × HM3Dq: $F_{1,26} = 0.1678$                                                                                  |          |
| <b>Fig. S6F Entries into open arm (%)</b> | all-yes  | yes | Genotype Factor: $F_{1,26} = 37.18$ ;<br>HM3Dq factor: $F_{1,26} = 2.548$ ;<br>Genotype × HM3Dq: $F_{1,26} = 0.002497$ | total=29 |
| <b>Fig. S7A</b>                           | yes, yes | yes | 4.597                                                                                                                  | 8        |
| <b>Fig. S7B</b>                           | yes, yes | yes | 3.649                                                                                                                  | 8        |
| <b>Fig. S7D Total distance</b>            | yes, yes | yes | 0.1943                                                                                                                 | 10       |
| <b>Fig. S7D Center time (%)</b>           | yes, yes | yes | 2.334                                                                                                                  | 10       |
| <b>Fig. S7D Center time (s)</b>           | yes, yes | yes | 2.362                                                                                                                  | 10       |
| <b>Fig. S7D Center distance (%)</b>       | no, no   | yes | —                                                                                                                      | —        |
| <b>Fig. S7E Time in open arm (s)</b>      | yes, yes | yes | 4.149                                                                                                                  | 10       |
| <b>Fig. S7E Number into open arm</b>      | yes, yes | yes | 6,916                                                                                                                  | 10       |
| <b>Fig. S7E Time in open arm (%)</b>      | yes, yes | yes | 3.896                                                                                                                  | 10       |
| <b>Fig. S7E Entries into open arm (%)</b> | yes, yes | yes | 2.649                                                                                                                  | 10       |
| <b>Fig. S7F</b>                           | yes, yes | yes | 5.232                                                                                                                  | 10       |
| <b>Fig. S8C</b>                           | yes, yes | yes | 3.499                                                                                                                  | 9        |
| <b>Fig. S8D Total distance</b>            | yes, yes | yes | 0.1451                                                                                                                 | 19       |
| <b>Fig. S8D Center time (%)</b>           | yes, yes | no  | 0.1473                                                                                                                 | 11.58    |
| <b>Fig. S8D Center time (s)</b>           | yes, yes | no  | 0.1631                                                                                                                 | 11.62    |
| <b>Fig. S8D Center distance (%)</b>       | yes, yes | yes | 0.9327                                                                                                                 | 19       |
| <b>Fig. S8E Time in open arm (s)</b>      | yes, yes | yes | 0.01298                                                                                                                | 19       |
| <b>Fig. S8E Number into open arm</b>      | yes, yes | yes | 0.1327                                                                                                                 | 19       |
| <b>Fig. S8E Time in open arm (%)</b>      | yes, yes | yes | 0.5384                                                                                                                 | 19       |
| <b>Fig. S8E Entries into open arm (%)</b> | yes, yes | yes | 0.1099                                                                                                                 | 19       |
| <b>Fig. S8F</b>                           | yes, yes | yes | 2.311                                                                                                                  | 19       |
| <b>Fig. S9C Npc</b>                       | yes, yes | yes | 1.078                                                                                                                  | 17       |
| <b>Fig. S9C Apoa1</b>                     | no, yes  | no  | —                                                                                                                      | —        |
| <b>Fig. S9C Ace2</b>                      | yes, yes | yes | 5.439                                                                                                                  | 17       |
| <b>Fig. S9C Crtap</b>                     | yes, yes | yes | 1.79                                                                                                                   | 17       |
| <b>Fig. S9C Cxcl9</b>                     | yes, yes | yes | 0.2802                                                                                                                 | 17       |
| <b>Fig. S9C Vegfb</b>                     | yes, yes | yes | 0.3359                                                                                                                 | 17       |
| <b>Fig. S9D Apoa1</b>                     | yes, yes | yes | 0.9845                                                                                                                 | 14       |
| <b>Fig. S9D Ace2</b>                      | yes, yes | yes | 2.279                                                                                                                  | 14       |
| <b>Fig. S9D Npc2</b>                      | yes, yes | no  | 1.089                                                                                                                  | 7.865    |
| <b>Fig. S9D Cxcl9</b>                     | yes, yes | yes | 0.2923                                                                                                                 | 14       |
| <b>Fig. S9D Grn</b>                       | no, yes  | yes | —                                                                                                                      | —        |
| <b>Fig. S9D Bgn</b>                       | yes, yes | yes | 2.393                                                                                                                  | 14       |
| <b>Fig. S10A Atf4</b>                     | yes, yes | no  | 19.92                                                                                                                  | 5        |
| <b>Fig. S10A Trb3</b>                     | yes, yes | yes | 17.49                                                                                                                  | 10       |
| <b>Fig. S10A Tff3</b>                     | yes, yes | yes | 5.717                                                                                                                  | 10       |
| <b>Fig. S10B Atf4</b>                     | no, yes  | no  | —                                                                                                                      | —        |

|                                            |                   |     |                                                                                                                           |             |
|--------------------------------------------|-------------------|-----|---------------------------------------------------------------------------------------------------------------------------|-------------|
| <b>Fig. S10B Trb3</b>                      | yes, yes          | yes | 2.491                                                                                                                     | 10          |
| <b>Fig. S10B Tff3</b>                      | yes, yes          | yes | 2.662                                                                                                                     | 10          |
| <b>Fig. S11A Jej</b>                       | yes, yes          | no  | 2.584                                                                                                                     | 5.905       |
| <b>Fig. S11A Ile</b>                       | yes, yes          | yes | 4.486                                                                                                                     | 12          |
| <b>Fig. S11A Col</b>                       | yes, yes          | yes | 5.592                                                                                                                     | 12          |
| <b>Fig. S11B</b>                           | yes, yes          | yes | 2.394                                                                                                                     | 12          |
| <b>Fig. S11C</b>                           | yes, yes          | yes | 2.394                                                                                                                     | 9           |
| <b>Fig. S11D</b>                           | yes, yes          | yes | 2.396                                                                                                                     | 9           |
| <b>Fig. S11E</b>                           | yes, no           | yes | —                                                                                                                         | —           |
| <b>Fig. S11F HY</b>                        | yes, yes          | yes | 0.03445                                                                                                                   | 11          |
| <b>Fig. S11F PVT</b>                       | yes, no           | no  | —                                                                                                                         | —           |
| <b>Fig. S11G HY</b>                        | yes, yes          | yes | 0.7755                                                                                                                    | 12          |
| <b>Fig. S11G PVT</b>                       | no, yes           | yes | —                                                                                                                         | —           |
| <b>Fig. S11H</b>                           | yes, yes          | yes | 2.383                                                                                                                     | 9           |
| <b>Fig. S11I Center time (%)</b>           | yes, no, yes, yes | yes | Genotype Factor: $F_{1,38} = 0.4814$ ;<br>TFF3 factor: $F_{1,38} = 2.343$ ;<br>Genotype $\times$ TFF3: $F_{1,38} = 6.522$ | total=41    |
| <b>Fig. S11J Time in open arm (s)</b>      | all-yes           | yes | Genotype Factor: $F_{1,42} = 4.387$ ;<br>TFF3 factor: $F_{1,42} = 9.758$ ;<br>Genotype $\times$ TFF3: $F_{1,42} = 1.857$  | total=45    |
| <b>Fig. S11J Number into open arm</b>      | all-yes           | yes | Genotype Factor: $F_{1,29} = 0.4649$ ;<br>TFF3 factor: $F_{1,29} = 1.249$ ;<br>Genotype $\times$ TFF3: $F_{1,29} = 9.164$ | total=32    |
| <b>Fig. S12B Center time (%)</b>           | all-yes           | yes | $F_{2,18} = 4.976$                                                                                                        | total=20    |
| <b>Fig. S12C Time in open arm (s)</b>      | all-yes           | yes | $F_{2,18} = 6.131$                                                                                                        | total=20    |
| <b>Fig. S12C Number into open arm</b>      | all-yes           | yes | $F_{2,18} = 5.519$                                                                                                        | total=20    |
| <b>Fig. S13C</b>                           | yes, yes          | yes | 3.058                                                                                                                     | 9           |
| <b>Fig. S13D Hypothalamus</b>              | yes, yes          | yes | 1.183                                                                                                                     | 9           |
| <b>Fig. S13D Cortex</b>                    | yes, yes          | yes | 1.468                                                                                                                     | 9           |
| <b>Fig. S13E Total distance</b>            | yes, yes          | yes | 0.7819                                                                                                                    | 18          |
| <b>Fig. S13E Center time (%)</b>           | yes, yes          | yes | 3.479                                                                                                                     | 18          |
| <b>Fig. S13E Center time (s)</b>           | yes, yes          | yes | 3.042                                                                                                                     | 18          |
| <b>Fig. S13E Center distance (%)</b>       | yes, yes          | yes | 3.31                                                                                                                      | 18          |
| <b>Fig. S13F Time in open arm (s)</b>      | yes, yes          | yes | 3.401                                                                                                                     | 18          |
| <b>Fig. S13F Number into open arm</b>      | yes, yes          | yes | 2.812                                                                                                                     | 18          |
| <b>Fig. S13F Time in open arm (%)</b>      | yes, yes          | yes | 4.204                                                                                                                     | 18          |
| <b>Fig. S13F Entries into open arm (%)</b> | yes, yes          | yes | 2.336                                                                                                                     | 18          |
| <b>Fig. S13G</b>                           | yes, yes          | yes | 2.506                                                                                                                     | 18          |
| <b>Fig. S14A</b>                           | all-yes           | no  | $F_{4,4,635} = 5.555$                                                                                                     | total=8.635 |
| <b>Fig. S15B</b>                           | all-yes           | yes | $F_{3,16} = 12.21$                                                                                                        | total=19    |

|                                            |                   |     |                                                                                                                                |          |
|--------------------------------------------|-------------------|-----|--------------------------------------------------------------------------------------------------------------------------------|----------|
| <b>Fig. S15C Center time (%)</b>           | all-yes           | yes | $F_{3,30} = 6.334$                                                                                                             | total=33 |
| <b>Fig. S15D Time in open arm (s)</b>      | all-yes           | yes | $F_{3,29} = 11.34$                                                                                                             | total=32 |
| <b>Fig. S15D Number into open arm</b>      | all-yes           | yes | $F_{3,31} = 7.805$                                                                                                             | total=34 |
| <b>Fig. S16B Total distance</b>            | yes, yes          | yes | 0.8924                                                                                                                         | 10       |
| <b>Fig. S16B Center time (%)</b>           | yes, yes          | yes | 0.08366                                                                                                                        | 10       |
| <b>Fig. S16B Center time (s)</b>           | yes, yes          | yes | 0.07995                                                                                                                        | 10       |
| <b>Fig. S16B Center distance (%)</b>       | yes, yes          | yes | 0.08124                                                                                                                        | 10       |
| <b>Fig. S16C Time in open arm (s)</b>      | yes, yes          | yes | 0.2379                                                                                                                         | 10       |
| <b>Fig. S16C Number into open arm</b>      | yes, yes          | yes | 0.2666                                                                                                                         | 10       |
| <b>Fig. S16C Time in open arm (%)</b>      | yes, yes          | yes | 0.3909                                                                                                                         | 10       |
| <b>Fig. S16C Entries into open arm (%)</b> | yes, yes          | yes | 1.277                                                                                                                          | 10       |
| <b>Fig. S16D</b>                           | yes, yes          | yes | 2.966                                                                                                                          | 10       |
| <b>Fig. S17C Total distance</b>            | all-yes           | yes | Genotype Factor: $F_{1,40} = 0.2109$ ;<br>HM4Di factor: $F_{1,40} = 0.7010$ ;<br>Genotype $\times$ HM4Di: $F_{1,40} = 0.01985$ | total=43 |
| <b>Fig. S17C Center time (%)</b>           | all-yes           | no  | Genotype Factor: $F_{1,40} = 3.740$ ;<br>HM4Di factor: $F_{1,40} = 6.629$ ;<br>Genotype $\times$ HM4Di: $F_{1,40} = 3.736$     | total=43 |
| <b>Fig. S17C Center time (s)</b>           | all-yes           | yes | Genotype Factor: $F_{1,40} = 5.489$ ;<br>HM4Di factor: $F_{1,40} = 3.498$ ;<br>Genotype $\times$ HM4Di: $F_{1,40} = 3.518$     | total=43 |
| <b>Fig. S17C Center distance (%)</b>       | all-yes           | yes | Genotype Factor: $F_{1,40} = 4.380$ ;<br>HM4Di factor: $F_{1,40} = 2.710$ ;<br>Genotype $\times$ HM4Di: $F_{1,40} = 3.554$     | total=43 |
| <b>Fig. S17D Time in open arm (s)</b>      | all-yes           | yes | Genotype Factor: $F_{1,40} = 1.120$ ;<br>HM4Di factor: $F_{1,40} = 2.024$ ;<br>Genotype $\times$ HM4Di: $F_{1,40} = 5.824$     | total=43 |
| <b>Fig. S17D Number into open arm</b>      | yes, yes, no, yes | yes | Genotype Factor: $F_{1,40} = 2.195$ ;<br>HM4Di factor: $F_{1,40} = 4.826$ ;<br>Genotype $\times$ HM4Di: $F_{1,40} = 4.708$     | total=43 |
| <b>Fig. S17D Time in open arm (%)</b>      | all-yes           | yes | Genotype Factor: $F_{1,40} = 1.850$ ;<br>HM4Di factor: $F_{1,40} = 3.102$ ;<br>Genotype $\times$ HM4Di: $F_{1,40} = 8.893$     | total=43 |
| <b>Fig. S17D Entries into open arm (%)</b> | yes, yes, yes, no | yes | Genotype Factor: $F_{1,40} = 2.186$ ;<br>HM4Di factor: $F_{1,40} = 2.903$ ;<br>Genotype $\times$ HM4Di: $F_{1,40} = 3.797$     | total=43 |
| <b>Fig. S17E</b>                           | all-yes           | yes | Genotype Factor: $F_{1,39} = 4.227$ ;<br>HM4Di factor: $F_{1,39} = 4.856$ ;<br>Genotype $\times$ HM4Di: $F_{1,39} = 2.028$     | total=42 |
